1 The impact of interspecies recombination on human herpes simplex virus evolution and host  
2 immune recognition

3  
4 Amanda M. Casto<sup>1\*</sup>, Pavitra Roychoudhury<sup>2</sup>, Hong Xie<sup>2</sup>, Stacy Selke<sup>1</sup>, Garrett A. Perchetti<sup>2</sup>, Haley  
5 Wofford<sup>1</sup>, Meei-Li Huang<sup>2</sup>, Georges M. G. M. Verjans<sup>3,4</sup>, Geoffrey S. Gottlieb<sup>1,5,6</sup>, Anna Wald<sup>1</sup>,  
6 Keith R. Jerome<sup>2,7</sup>, David M. Koelle<sup>1,2,5,6,7,8</sup>, Christine Johnston<sup>1,7</sup>, Alexander L. Greninger<sup>2\*</sup>

7  
8 <sup>1</sup>Department of Medicine, University of Washington, Seattle, Washington, USA

9 <sup>2</sup>Department of Laboratory Medicine, University of Washington, Seattle, Washington, USA

10 <sup>3</sup>Department of Viroscience, Erasmus MC, Rotterdam, The Netherlands

11 <sup>4</sup>Research Center for Emerging Infectious and Zoonoses, University of Veterinary Medicine  
12 Hannover, Hannover, Germany

13 <sup>5</sup>Department of Global Health, University of Washington, Seattle, Washington, USA

14 <sup>6</sup>Center for Emerging and Re-Emerging Infectious Diseases, University of Washington, Seattle,  
15 Washington, USA

16 <sup>7</sup>Vaccine and Infectious Diseases Division, Fred Hutchinson Cancer Research Center, Seattle,  
17 Washington, USA

18 <sup>8</sup>Benaroya Research Institute, Seattle, Washington, USA

19

20 \*To whom correspondence should be addressed:

21 Amanda Casto

22 1959 NE Pacific St.

23 Box 356423

24 Seattle, WA 98195-6423

25 [amcasto@uw.edu](mailto:amcasto@uw.edu)

26 -----

27 Alexander Greninger

28 Suite 320

29 1616 Eastlake Ave. E

30 Seattle, WA 98102

31 [agrening@uw.edu](mailto:agrening@uw.edu)

32

33

34

35 Running Title: Interspecies Recombination in the HSV Genomes

36

37

38

39

40 **Abstract**

41           Among the most ubiquitous of human pathogens, HSV-1 and HSV-2 are distinct viral  
42 species that diverged about six million years ago. At least four ancient HSV-1 x HSV-2  
43 interspecies recombination events have affected the HSV-2 genome, with recombinants and  
44 non-recombinants at each locus circulating today. Though interspecies recombination has  
45 occurred in the past, its importance in HSV evolution remains incompletely defined. Using 255  
46 newly-sequenced and 219 existing HSV genome sequences, we comprehensively assessed  
47 interspecies recombination in HSV. The novel recombinants we identify demonstrate that the  
48 sizes and locations of interspecies recombination events in HSV-2 are more variable than  
49 previously appreciated. One novel recombinant arose in its current host, showing for the first  
50 time that interspecies recombination occurs in contemporary HSV populations. We also  
51 demonstrate that interspecies recombination affects T-cell recognition of HSV. Our findings  
52 indicate that interspecies recombination can significantly influence genetic variation in and host  
53 immunologic response to HSV-2.

54

55

56

57

58

59

60

61

## 62 **Introduction**

63           The herpes simplex viruses (HSV-1 and HSV-2) are ubiquitous human pathogens with 3.7  
64 billion HSV-1 and 417 million HSV-2 infected individuals worldwide (Looker et al., 2015a,  
65 2015b). Both viruses establish lifelong infections typically characterized by mild, intermittent  
66 clinical symptoms. However, HSV can also cause significant morbidity and mortality, particularly  
67 among the immunocompromised and in neonates (Corey et al., 1983; Corey and Wald, 2009).  
68 Furthermore, genital HSV-2 infection has helped fuel the HIV epidemic by increasing the risk of  
69 HIV infection (Johnson et al., 2011; Masese et al., 2015; Zhu et al., 2009). While antivirals can  
70 reduce symptoms, they do not cure infection and do not completely prevent viral shedding and  
71 transmission, leading to the urgent need for an HSV vaccine (Gottlieb et al., 2016).

72           Instrumental in the development of an HSV vaccine and of new pharmaceutical  
73 therapies for HSV is a better understanding of the evolution of HSV and of the genetic variation  
74 among viral strains. HSV-1 and HSV-2 diverged from one another about 6 million years ago after  
75 which HSV-1 evolved in the human lineage and HSV-2 in the chimpanzee lineage (Wertheim et  
76 al., 2014). A human ancestor then acquired HSV-2 as a zoonotic infection from a chimpanzee  
77 ancestor 1.4 – 3 million years ago (Wertheim et al., 2014). Early studies of HSV genomes  
78 indicated that the viral species were relatively homogenous (mean pairwise distances among  
79 HSV-1 and HSV-2 strains are 0.8% and 0.2%, respectively) (Kolb et al., 2015). However, in 2015,  
80 a variant HSV-2 strain was described that was highly divergent from other HSV-2 samples at a  
81 single genomic locus (Burrell et al., 2015). This divergent region was likely affected by an ancient  
82 HSV-1 x HSV-2 interspecies recombination event with both recombinant and non-recombinant  
83 genotypes at this locus observed among HSV-2 strains today (Burrell et al., 2017; Koelle et al.,

84 2017). Ultimately, four loci, totaling about 1% of the HSV-2 genome, were found that carried  
85 evidence of such recombination events (Burrell et al., 2017; Koelle et al., 2017) . For three of the  
86 loci, subgenomic regions within the UL29, UL30, and UL39 genes, recombinant genotypes were  
87 commonly observed among HSV-2 samples. Only one HSV-2 sample has been found that carries  
88 HSV-1 sequence at the fourth locus, which falls within UL15.

89         The high degree of divergence between recombinant and non-recombinant HSV-2  
90 strains within these regions relative to the mean pairwise divergence elsewhere in the genome  
91 demonstrates that interspecies recombination could significantly contribute to variation among  
92 HSV-2 strains. However, numerous questions remain about the role of interspecies  
93 recombination in the evolution of HSV-2. In particular, it remains unknown whether  
94 interspecies recombination can affect loci other than those previously described in UL15, UL29,  
95 UL30, and UL39 and if interspecies recombination continues to affect contemporary HSV  
96 populations as all events described to date are thought to have occurred in a historical context.  
97 If HSV interspecies recombinants are still being generated, it is also unclear if the increasing  
98 number of immunocompromised hosts (Harpaz et al., 2016) or if changes in the epidemiology  
99 of HSV infection, such as the increase in genital HSV-1 (Chiam et al., 2010; Gilbert et al., 2011;  
100 Ryder et al., 2009), will alter the impact interspecies recombination has on genomic variation in  
101 HSV. We sought to answer these questions by performing a comprehensive survey of  
102 interspecies recombination on a large dataset of HSV genome sequences comprised of both  
103 previously available and newly-generated sequences.

104

105

106 **Results**

107 *New sequencing more than doubles pool of available HSV genomes*

108 We generated genome sequences for a total of 59 HSV-1 clinical samples, nearly  
109 doubling the number of HSV-1 genomes available for analysis (Supplementary Table 1). Fifty-  
110 eight of these samples were collected in Seattle, WA, USA, and one was from Uganda  
111 (Supplementary Table 2). Nine out of these newly-sequenced samples were from 6 persons  
112 who are genitally co-infected with HSV-1 and HSV-2 (Supplementary Table 3). For HSV-2, we  
113 generated 196 new genome sequences, increasing the total number of available HSV-2  
114 genomes by 137% (Supplementary Table 4). Most (161 out of 196, or 82%) of these newly-  
115 sequenced samples were collected in Seattle, though samples collected in Cameroon (20), Peru  
116 (3), Senegal (10), and Uganda (2) were also sequenced. Eleven of these samples were from 6  
117 persons genitally co-infected with HSV-1 and HSV-2. The countries of origin as well as the  
118 gender and HIV status of the carriers of viruses are reported for all newly-generated HSV  
119 genomes and for all the HSV genomes that were available in GenBank as of April 2018 in  
120 Supplementary Tables 1, 2, and 4.

121

122 *No evidence of interspecies recombination found within HSV-1 genomes*

123 We examined the newly-sequenced HSV-1 genomes for HSV-1 x HSV-2 recombination  
124 events using both the Recombination Detection Program (RDP) software and manual alignment  
125 review (see Methods). All HSV-1 genomes were aligned with an HSV-2 reference (SD90e,  
126 KF781518) and a chimpanzee herpesvirus, or ChHV, reference (NC\_023677) separately to avoid  
127 detection of intraspecies recombination events. As a positive control, we first reviewed the

128 output of RDP for the regions of UL29 and UL30 where the HSV-2 reference strain SD90e carries  
129 recombinant HSV-1 sequence. RDP detected the UL29 and UL30 events in all 59 of the HSV-1-  
130 SD90e-ChHV alignments. RDP did return other putative events for all HSV-1 alignment trios.  
131 However, these events generated higher p-values than the UL29 and UL30 events for the same  
132 metric (Supplementary Note 1, Supplementary Figure 1) and we did not see evidence for  
133 recombination at the indicated loci on manual review. Overall, in line with previous results  
134 (Burrel et al., 2017; Koelle et al., 2017), we found no evidence of HSV-1 x HSV-2 recombination  
135 in the 59 newly-sequenced HSV-1 genomes.

136

137 *Interspecies recombination event spans multiple ORFs and is stable within host*

138         Next, we analyzed 230 HSV-2 (196 newly generated and 34 previously unanalyzed)  
139 genome sequences for interspecies recombination again using both RDP and manual review.  
140 Five previously undescribed interspecies recombination events were observed. A sample  
141 collected from an HIV negative woman in Seattle (2015-14086, MF510363) contained 7  
142 kilobases (kb) of HSV-1 sequence spanning half of UL29 and all of UL30 and UL31 (nucleotides  
143 60,761 - 67,777 in SD90e reference) (Figure 1A, Supplementary Figure 2). The longest  
144 interspecies recombination event described prior to this measured 538 basepairs (bp) (Burrel et  
145 al., 2017; Koelle et al., 2017). Sanger sequencing confirmed the breakpoints of this event. We  
146 sequenced two additional samples from the same person (2013-34209, MH790566; 2014-  
147 13047, MH790604; Figure 1B). The 3 sequenced samples were collected over a period of 659  
148 days. The 2 additional samples also contained the 7 kb UL29 – UL31 recombination event.  
149 Across the recombinant region, the 3 sequences were identical (only coding sequence was

150 considered in sequence comparisons). The three HSV-1 sequences with the most similarity to  
151 the recombinant within the recombinant region were all collected in Seattle, including two that  
152 differed by 5 SNPs and one that differed by 6 (Figure 1C). Outside the recombinant region,  
153 there was only one polymorphic site among the three sequences; they formed a single clade in  
154 a phylogenetic tree of all available HSV-2 sequences (Figure 1D).

155         Because it spans the entire UL30 ORF, this event encompasses the region affected by  
156 the previously-defined recombination event in UL30. It does not encompass the part of the  
157 UL29 ORF where the UL29 recombination event is observed (Burrell et al., 2017; Koelle et al.,  
158 2017). We hypothesized that the UL30 recombinant genotype could have descended from the  
159 UL29 – UL31 recombinant through backcrosses. However, in a phylogenetic tree of the UL30  
160 recombinant region, the UL29 – UL31 recombinant does not cluster with samples carrying the  
161 UL30 recombination event, suggesting that the UL29 – UL31 recombinant and the UL30  
162 recombinants were derived from different HSV-1 parental strains (Figure 1E).

163

#### 164 *Interspecies recombinant generated in HSV-1/HSV-2 genitally co-infected host*

165         A second novel interspecies recombination event was observed in a sample from a  
166 different HIV negative woman from Seattle (1996-26333, MH790638). This person has had both  
167 HSV-1 and HSV-2 detected in genital swabs. This event is more than 6 kb in length, spanning  
168 half of UL47 and all of UL48, UL49, and UL49A, and most of UL50 (nucleotides 102,443 to  
169 108,479 in the SD90e reference) (Figure 2A, Supplementary Figure 3). Sanger sequencing also  
170 confirmed the breakpoints of this event. Within the recombinant region, the recombinant HSV-  
171 2 sample differed from an HSV-1 sample from the same person (1995-63175, MG999862) by

172 just one SNP (Figure 2B). We then compared the recombinant region to the rest of our HSV-1  
173 dataset. The next most similar sequence had 6 nucleotide differences and had been collected in  
174 Germany, followed by a sequence with 7 differences that was collected in Seattle. These data  
175 suggest that the HSV-1 strain collected from the person with the UL47-UL50 recombinant is  
176 most likely the HSV-1 parent of the recombinant strain (Figure 2C).

177 We next sequenced three additional HSV-2 samples collected before the original sample  
178 (1996-26333) from the same person (1995-56864, MH790588; 1995-57888, MH790664; 2018-  
179 5934, MH790582). The samples (4 HSV-2 and one HSV-1) sequenced for this person were  
180 collected over a 151-day period (see Figure 2B). One of the 3 additional HSV-2 samples (2018-  
181 5934), collected one day before the original sample (1996-26333), carried the UL47-UL50  
182 recombination event. However, two other samples (1995-56864, 1995-57888) both collected  
183 earlier than the recombinant HSV-2 samples did not contain the recombination event. Outside  
184 the recombinant region all four of the HSV-2 samples phylogenetically clustered together  
185 (Figure 2D), suggesting that that the non-recombinant HSV-2 strain from this person is the most  
186 likely HSV-2 parent for the UL47 – UL50 recombinant.

187

188 *Novel events vary widely in size and location*

189 In addition to the two large recombination events, we observed three other small novel  
190 events. The first of these was a 40 bp event in UL17 (Supplementary Figure 4), which resulted in  
191 9 nucleotide and 3 amino acid changes. This was observed in a single sample from a man with  
192 HIV infection from Seattle (2005-42278, MH790643). The second small event was a 52 bp event  
193 in UL28 that resulted in 4 nucleotide and no amino acid changes. It was observed in 4 samples



194 from 4 different individuals, all of which were collected in East Africa (three in Uganda, one in  
195 Kenya) (2012-18385, MF510324; 2009-3495, MF510280; 2012-18420, MF510337; 2009-4463,  
196 MF621258). This small event was detected only by manual review. Finally, we observed a 259  
197 bp event in UL32 which resulted in 25 nucleotide and 4 amino acid changes (Supplementary  
198 Figure 5). This event was observed in 3 samples collected over a 12-year period from the same  
199 HIV negative man in Seattle (2002-14972, MH790585; 2014-14807, MF510306; 2014-14811,  
200 MF510292).

201

#### 202 *Four rare genotypes found at UL29 recombinant locus*

203 We next sought to characterize variation at the 3 loci in HSV-2 (UL29, UL30, and UL39)  
204 where interspecies recombinant genotypes are common (Burrell et al., 2017; Koelle et al., 2017)  
205 by assigning a genotype to each HSV-2 sequence for each of these 3 loci (Supplementary Note  
206 2). We report first on the results for UL29, which encodes the HSV single stranded binding  
207 protein, ICP8 (Mapelli et al., 2005) (Figure 3A). The interspecies recombination event in UL29  
208 affects a 121 amino acid (363 bp) region in the C-terminal half of the protein. The full length  
209 recombinant genotype, which we called the common recombinant or CR genotype, was present  
210 in 98.1% of HSV-2 sequences (209 out of 213) (see methods for a description of the sequences  
211 included in this count). Only one sequence out of 213 (0.5%) carried the non-recombinant (NR)  
212 genotype (Figure 3B). This HSV-2 sample was collected from an HIV positive woman in  
213 Cameroon. We additionally noted a total of 4 rare recombinant genotypes at this locus, 3 of  
214 which are previously undescribed (the fourth rare genotype is described in Koelle et al., 2017).  
215 Each of these rare genotypes was seen in a single sample from Cameroon (R1), Seattle (R2),

216 DRC (R3), and Kenya (R4). The CR genotype at UL29 is characterized by two stretches of HSV-1  
217 sequence separated by a non-recombinant region and as such has 4 different breakpoints  
218 (UL29 nucleotide positions 2,076 and 2,136 mark of the ends of the HSV-1 sequence for the first  
219 block; 2,196 and 2,439 mark the ends of the second block). All of the rare genotypes share at  
220 least 2 breakpoints with the CR genotype except for R1, which has just one stretch of HSV-1  
221 sequence with 2 unique breakpoints (UL29 nucleotides 1,815 and 2,196). Intriguingly, the  
222 recombinant portion of UL29 maps to functionally critical portions of the protein which allow it  
223 to resist proteolysis and interact with single-stranded DNA (Mapelli et al., 2005) (Figure 3C).

224

225 *UL30 has two recombinant genotypes*

226 UL30 encodes the catalytic subunit of the DNA polymerase (Liu et al., 2006). The  
227 interspecies recombination event in UL30 affects a 180 amino acid (538 bp) region in the C-  
228 terminal half of the protein (Figure 4A). The full length or common recombinant (CR) genotype  
229 was observed in 95.7% (202 out of 211 with 2 excluded for missing data) of HSV-2 sequences  
230 (Figure 4B). The non-recombinant genotype (NR) was observed in 8 sequences (3.8%). These  
231 sequences were from Uganda (4), Cameroon (2), and Seattle, WA, USA (2). Two (10.5%) out of  
232 19 sequences from Central Africa and four (15.3%) out of 26 sequences from East Africa had the  
233 NR genotype. There was only one rare genotype (R1) observed for UL30. This genotype has not  
234 been described previously and has a shorter HSV-1 block than the common recombinant, with a  
235 unique 5' breakpoint (UL30 nucleotide 2,926) but the same 3' breakpoint (UL30 nucleotide  
236 3,409) as the CR genotype. The R1 genotype has no amino acid differences relative to the CR

237 genotype. The sample carrying R1 at UL30 was collected in Seattle. Five other samples from the  
238 same person also carried this rare genotype.

239         The recombinant region of UL30 encodes a portion of the thumb domain of the DNA  
240 polymerase (Liu et al., 2006) (Figure 4C). This critical domain interacts with double-stranded  
241 DNA as it leaves the catalytic center of the enzyme. Though none of the 23 residues affected by  
242 the recombination event have been associated with drug resistance to date, 21.5% of drug-  
243 resistance (acyclovir, penciclovir, foscarnet, cidofovir) mutations identified in the HSV-1 DNA  
244 polymerase are in the thumb domain (Sauerbrei et al., 2016; Topalis et al., 2016).

245

#### 246 *UL39 contains a complex recombination locus*

247         UL39 encodes the large subunit of the HSV ribonucleotide reductase (Conner et al.,  
248 1994). The interspecies recombination event affects a 152 amino acid (456 bp) region of this  
249 gene. This recombinant locus exhibits high sequence diversity with several common and  
250 numerous rare genotypes (Koelle et al., 2017). We defined genotypes at this locus first at the  
251 nucleotide level (see Supplementary Note 2). However, given the large number of nucleotide  
252 genotypes observed (21), we ultimately elected to group genotypes together if they had the  
253 same amino acid sequence. The most common nucleotide sequence corresponding to each  
254 amino acid sequence is illustrated in Figure 5A.

255         Most HSV-2 samples (135 out of 211, or 64.0%) had the non-recombinant (NR) genotype  
256 at UL39 (Figure 5B). There are 2 common recombinant genotypes at the UL39 locus. Common  
257 recombinant 1 (CR1) has 456 bp of HSV-1 sequence (breakpoints at UL39 nucleotides 2,373 and  
258 2,829) and was seen in 54 (25.6%) of 211 (two with missing data excluded) samples. Common

259 recombinant 2 (CR2) has 234 bp of HSV-1 sequence (breakpoints at UL39 nucleotides 2,373 and  
260 2,607) and was seen in 16 (7.6%) of 211 samples. The remaining seven samples have 7 distinct,  
261 rare recombinant genotypes, 5 of which are previously undescribed (R3 and R7 described in  
262 Koelle et al., 2017). Samples with rare genotypes at UL39 were from the US (3), Cameroon (1),  
263 the DRC (1), Finland (1), and Kenya (1). Interestingly, the samples from Cameroon and from  
264 Kenya both also had rare genotypes for the UL29 locus.

265         Given the lack of a crystal structure for the HSV ribonuclease reductase, the protein  
266 structure of yeast ribonucleotide reductase (see Methods) is shown in Figure 5C (Xu et al.,  
267 2006). Three of the main murine subdominant epitopes recognized by HSV-1 specific CD8 cells  
268 have been mapped to the UL39 gene product (St Leger et al., 2011). One of these epitopes,  
269 which includes HSV-1 UL39 amino acids 822 – 829 (corresponding to HSV-2 UL39 amino acids  
270 826 – 833), is within the region affected by interspecies recombination (St Leger et al., 2011).  
271 The NR version of this epitope contains two amino acid changes relative to the CR1 and CR2  
272 genotypes. Functional experiments have demonstrated that the HSV-1 specific CD8+ T-cells that  
273 recognize the CR1/CR2 version of this epitope do not recognize the NR version (Salvucci et al.,  
274 1995).

275

#### 276 *Recombinant genotypes at UL29, UL30, and UL39 are stable over time*

277         To determine whether genotypes at the UL29, UL30, and UL39 loci are stable over time  
278 within hosts, we identified people who had more than one sequenced HSV-2 sample. Out of 65  
279 such persons, the samples for 57 (87.7%) had the same genotypes at the UL29, UL30, and UL39

280 loci. The remaining 8 persons had all previously been identified as being infected with at least 2  
281 distinct HSV-2 strains (Johnston et al., 2017).

282           One of these 8 persons, a man with HIV infection from Seattle, had a total of 4  
283 sequenced samples. The two sequences that were analyzed in the Johnston et al., 2017 study  
284 (2003-18061, MF510298; 2007-22031, MF510341) had the same genotypes at the UL29, UL30,  
285 and UL39 loci with the NR genotype at the UL39 locus. However, we noted that a third  
286 sequence (2003-16029, KX574903) from this person had the CR1 genotype at UL39. We  
287 confirmed UL39 genotype assignments for all three of these samples using Sanger sequencing.  
288 We then compared these 3 sequences across the entire length of the genome. The two  
289 previously studied sequences differed from one another at 251 SNPs while the third sequence  
290 differed from the first two at 105 and 120 SNPs, respectively. In the Johnston et al. study, the  
291 strains in persons infected with two strains differed from one another by 87 to 305 SNPs (range  
292 based on 13 sequence pairs). Taken together, this suggests that this person is infected with at  
293 least 3 different HSV-2 strains.

294

295 *One HSV-2 sequence from Cameroon had no observed HSV-1 recombination events*

296           We noted that one sample from Cameroon had the non-recombinant genotype at the  
297 UL29, UL30, and UL39 loci and did not contain any other interspecies recombination events.  
298 This sequence (2006-16150, MH790600) would be a useful alternative reference sequence to  
299 SD90e (KF781518) and HG52 (JX112656) for studies of HSV evolution as both of these  
300 sequences contain recombinant HSV-1 sequence. This sample has been sequenced to high  
301 quality with 50x or higher coverage for 95.8% of the full genome.

302 *Interspecies recombination impacts recognition of HSV by T-cells*

303           In order to understand the functional importance of HSV interspecies recombination *in*  
304 *vivo*, we investigated whether interspecies recombination alters HSV recognition by CD4 and  
305 CD8 T-cells. We found that a polyclonal CD4 T-cell line (from an HSV-1-infected donor,  
306 GU14669) (Supplementary Table 5) strongly recognized full-length UL30 from both an HSV-1  
307 strain (lab strain E115) and HSV-2 strains with the UL30 CR genotype (strains HG52 and 186,  
308 JX112656 and JN561323, respectively). However, these T-cells failed to recognize the NR  
309 version of UL30 (2008\_15116, MF621257) (Figure 6A). We next examined T-cell recognition of  
310 the UL47-UL50 recombinant (1996\_26333, MH790638) relative to HSV-1 and HSV-2 samples  
311 without the recombination event. A CD8 T-cell clone (1874.1191.22) (Supplementary Table 5)  
312 recognizing an epitope in HSV-2 UL47 laying outside the UL47 – UL50 recombination event  
313 (amino acids 551-559) but not recognizing HSV-1 recognized the UL47 – UL50 recombinant  
314 (Figure 6B). However, a CD8 T-cell clone (5101.1999.23) recognizing an epitope in HSV-2 UL47  
315 at amino acids 289 – 298, which lies within the HSV-1 portion of UL47 in the recombinant, failed  
316 to recognize the recombinant. Conversely, two CD8 cell lines (TG3 UL48 N, TG3 UL48 C) that  
317 recognize HSV-1 UL48 but do not recognize HSV-2 UL48 gained novel recognition of the HSV-2  
318 UL47-UL50 recombinant (Figure 6C, 6D, 6E). As a negative control, we also tested a CD4 cell  
319 clone (9447.28) that recognizes a peptide in UL49 identical in HSV-1 and HSV-2. As expected,  
320 this clone recognized the recombinant (Figure 6F). These results illustrate that interspecies  
321 recombination can serve as a mechanism of T-cell immune evasion.

322

323

324 **Discussion**

325           It has long been known that HSV-1 and HSV-2 could recombine *in vitro* (Halliburton,  
326 1980; Morse et al., 1977), but only recently appreciated that interspecies recombination has  
327 impacted the genome of nearly all HSV-2 clinical samples sequenced to date. Because HSV-2  
328 has the potential to evolve more rapidly via recombination than through point mutation, a  
329 greater understanding of when, where, and why *in vivo* HSV interspecies recombination occurs  
330 and what its impacts are on human immunological response to HSV has important clinical and  
331 public health implications. Here we show that interspecies recombination events are more  
332 pervasive in the HSV-2 genome than previous appreciated and that they continue to be  
333 generated in circulating HSV-2 strains. We also demonstrate that such recombination can alter  
334 the recognition of HSV by CD4 and CD8 T-cells.

335           Consistent with earlier findings, we found no evidence of HSV-2 sequence in any of the  
336 HSV-1 genomes that we analyzed. While interspecies recombination events in HSV-1 may still  
337 exist, a profound asymmetry between the receptivity of the HSV-1 and HSV-2 genomes to  
338 sequence from the other HSV species is evident, given that almost all HSV-2 genomes contain  
339 some HSV-1 sequence. Since HSV-1 interspecies recombinants have been observed *in vitro*, the  
340 barrier to the presence of HSV-2 DNA in HSV-1 genomes is presumably downstream from the  
341 recombination event itself. It has been purposed that this barrier is at the level of transmission  
342 (Burrel et al., 2017). However, the failure to detect even one instance of recombinant HSV-1 in  
343 135 HSV-1 genomes, including 9 from genitally co-infected persons (where the viruses are not  
344 relegated to different anatomic sites) is suggestive that the barrier may, in fact, be earlier in the  
345 HSV-1 life cycle. Overall, the one-way exchange of DNA between HSV-1 and HSV-2 *in vivo* is a

346 curious feature of the evolution of these two viruses which does not yet have a clear  
347 explanation.

348 In HSV-2, recombinant genotypes at the UL29, UL30, and UL39 are observed at high  
349 frequencies, suggesting they have a selective advantage. Given the scarcity of the UL29 and  
350 UL30 NR genotypes, the recombinant regions in these two essential genes may prove useful as  
351 drug or vaccine targets given the sequence identity between HSV-1 and most HSV-2 strains at  
352 these loci. Our analysis of the UL29, UL30, and UL39 recombinant regions also established that  
353 there are both common and rare recombinant genotypes at all three loci. This finding suggests  
354 that these recombinant genotypes are not static but continue to evolve both through inter- and  
355 intraspecies recombination. Indeed, this process may be accelerating as rare genotypes, such as  
356 the NR genotypes at UL29 and UL30, are shuffled around the world by globalization. The  
357 potential for rapid creation of new genotypes through recombination at these loci is perhaps  
358 most concerning at the UL30 locus, as the region of the gene where HSV-1 sequence is  
359 commonly observed is also where about 20% of all described drug resistance mutations in UL30  
360 are located (Sauerbrei et al., 2016; Topalis et al., 2016).

361 We also present significant additional data that the effects of interspecies  
362 recombination on HSV-2 are not restricted to the previously defined events in UL15, UL29,  
363 UL30, and UL39. Among the novel events we describe are two that are several kilobases in  
364 length and span multiple genes; both of these events are more than 10 times larger than the  
365 largest event described in Burrell et al., 2017 and Koelle et al., 2017. Furthermore, we provide  
366 evidence that these recombinant viruses are stable and can be persistently shed for years. Even  
367 if recombinant HSV-2 with such large recombination events are rare, any advantageous HSV-1



368 alleles in the region could theoretically disperse throughout the HSV-2 population via  
369 subsequent intraspecies recombination.

370 Our findings also challenge the supposition that new interspecies recombinant  
371 genotypes are no longer being generated in modern HSV-2 populations. In particular, the large  
372 sizes of the UL29-UL31 and UL47-UL50 events are by themselves suggestive that they were  
373 generated recently as intraspecies recombination has not had time to reduce their size through  
374 backcrosses with non-recombinant genomes. Furthermore, we present evidence that one of  
375 these two events, UL47-UL50, arose in the person from whom it was collected. This particular  
376 person is one of six genitally co-infected people from whom we have a sequenced HSV-2  
377 sample. The high incidence of recombinant HSV-2 with large HSV-1 blocks in genitally co-  
378 infected persons is striking relative to the incidence of such recombinants among all individuals  
379 with a sequenced HSV-2 sample (1 in 6 compared to 2 in 231). This finding, coupled with our  
380 documentation of the generation of the UL47 – UL50 recombinant in a genitally co-infected  
381 person, suggests that genital co-infection fosters interspecies recombination. This is  
382 noteworthy as the incidence of genital HSV-1 has been shown in multiple studies to be  
383 increasing (Chiam et al., 2010; Gilbert et al., 2011; Ryder et al., 2009). The evidence we present  
384 here indicates that this epidemiologic shift could lead to an increase in the frequency of  
385 recombinant HSV-2.

386 The existence of interspecies HSV-2 recombinants has numerous potential impacts on  
387 clinical phenotype and on the development of new therapeutics, including an HSV vaccine. We  
388 demonstrate here that interspecies recombination can profoundly alter T-cell recognition of  
389 HSV. In particular, we showed that HSV-2 strains can completely gain or lose recognition by a

390 particular T-cell clone through a single interspecies recombination event suggesting a  
391 mechanism by which such recombination could result in immune escape. Given the ability of  
392 interspecies recombination to significantly alter the T-cell repertoire that recognizes an HSV-2  
393 strain, a better understanding of the natural history of HSV recombination and of the  
394 worldwide distribution of interspecies recombinants is absolutely crucial to the development of  
395 an effective HSV-2 vaccine. Other curative therapeutic approaches for HSV such as the  
396 disruption of latent HSV by targeted endonucleases could take advantage of the high  
397 prevalence of interspecies recombinant genotypes for UL29 and UL30 in HSV-2. These two  
398 essential genes have already been successfully targeted by CRISPR/Cas9 (van Diemen et al.,  
399 2016).

400 We recognize several limitations of our work. First of all, our analysis of recombinant  
401 genotypes at the UL29, UL30, and UL39 loci is limited by our sample set, which is not ideal for  
402 approximating the true prevalences of these genotypes in the populations covered. Our study  
403 constitutes a secondary analysis of HSV samples collected for various clinical studies and not at  
404 random from the represented populations. Sample sizes for geographic locations are also often  
405 limited. Because of this, the samples from any given location may represent a sub-population of  
406 the HSV-2 circulating at that location rather than being reflective of the population at large.  
407 Our results serve to put a prior probability on interspecies recombination prevalence in HSV  
408 and suggest that more rigorous sequencing of HSV from diverse human populations is required  
409 to more accurately measure this prevalence.

410 We also recognize that we may have underestimated the degree of HSV-1 x HSV-2  
411 recombination, as even though the capture technique that we used for HSV sequencing greatly

412 improved our ability to obtain high-quality, genome sequences, there remain portions of the  
413 HSV genome that are difficult to accurately sequence due to particularly high GC content and  
414 the presence of repeats. In general, these occur outside genic loci though some coding regions  
415 (such as UL36) contain difficult to sequence repeats. Because of these sequencing limitations, it  
416 remains challenging to confidently assess whether HSV-1 x HSV-2 recombination has an impact  
417 on these regions in either HSV genome.

418 In summary, our work demonstrates that the effects of interspecies recombination on  
419 the HSV-2 genome are less constrained than previously thought. We show that in addition to  
420 the 3 loci where recombinant genotypes are common (UL29, UL30, and UL39), there are a  
421 number of other loci that have been affected by interspecies recombination. Our results also  
422 demonstrate that recombination events can vary widely in size from about 50bp to multiple  
423 kilobases in length. We also show that interspecies recombination events continue to be  
424 generated in circulating HSV-2 clinical strains and that they are stable within hosts. Finally, we  
425 demonstrate that interspecies recombination can alter immune response to HSV by adding or  
426 removing T-cell epitopes. Together these findings suggest that interspecies recombination has  
427 significant impacts on HSV-2 genetic diversity and evolution with major implications for HSV  
428 vaccine and drug design.

429

## 430 **Methods**

### 431 *Samples*

432 All sequenced samples were collected from 1994 to 2016 as part of clinical research  
433 studies on HSV infection at the University of Washington Virology Research Clinic (for Seattle

434 samples) or at international study sites in Cameroon, Peru, Senegal, and Uganda. Oral and  
435 genital swabs were either self-collected by participants or collected by clinicians. Swabs were  
436 collected directly from genital lesions or from mixed anogenital swabs as previously described  
437 (Tronstein et al., 2011). Written informed consent to collect swabs and demographic  
438 information was obtained from all participants. All studies were approved by the University of  
439 Washington (UW) Human Subjects Division and the local institutional review boards/ethics  
440 committees for the international sites.

441 All sequenced samples had HSV viral loads greater than 1,000 copies/mL due to  
442 limitations in recovering high confidence genomic sequences from samples with lower viral  
443 loads (Greninger et al., 2018). We selected samples in our dataset with respect to geographic  
444 origin and collection date. We also specifically included samples from individuals who had had  
445 both HSV-1 and HSV-2 detected in genital tract swabs (genital co-infection) as defined using our  
446 UL27 (gB)-based genotyping platform (Corey et al., 2005) and from individuals superinfected  
447 with more than one HSV-2 strain (as identified in Johnston et al., 2017). See Supplementary  
448 Note 3 for more details on sample selection.

449

#### 450 *Sequencing and Consensus Generation*

451 Samples selected for sequencing underwent the next-generation, direct-capture  
452 sequencing method for HSV previously described in Greninger et al., 2018. DNA was extracted  
453 directly from sample swabs. Pooled DNA from multiple samples was then sequenced following  
454 enrichment using HSV-1 and HSV-2 specific oligonucleotide capture panels.

455 Consensus sequences and .bam files for newly-generated sequences were created from  
456 raw sequencing reads using the computational pipeline as previously described in Greninger et  
457 al., 2018, which is publicly available at <https://github.com/proychou/HSV/>. For HSV-1  
458 sequences, strain 17 (NC\_001806) was used as the reference (Davison, 2011). For HSV-2  
459 sequences, SD90e (KF781518) was used as the reference (Colgrove et al., 2014). Of the 70 HSV-  
460 1 and 238 HSV-2 samples we attempted to sequence, we were successfully able to generate 59  
461 HSV-1 and 196 HSV-2 high confidence consensus sequences. Sequencing data and GenBank  
462 accession numbers for all newly-generated sequences are listed in Supplementary Tables 1 and  
463 4. Samples we were unable to sequence are marked as “failed”.

464 For HSV-2, in addition to the 196 newly-generated sequences, we downloaded an  
465 additional 34 consensus sequences that had not previously been analyzed for recombination  
466 directly from GenBank. These included KY922720 – KY922726 (direct submission) and 28  
467 sequences from Johnston et al., 2017 (see Supplementary Table 4).

468

#### 469 *Detection of Novel Recombination Events*

470 Each HSV-1 sequence in our dataset of 59 newly-generated sequences was aligned with  
471 HSV-2 SD90e (KF781518) and a chimpanzee herpesvirus (ChHV, NC\_023677) (Severini et al.,  
472 2013) reference sequence using MAFFT (Kato and Standley, 2013). Each of these sequence  
473 trios were then run through RDP4, version Beta 4.95 (Martin et al., 2015). The RDP program  
474 was run from the command line with the default settings. This program uses the RDP,  
475 GENECONV, Chimaera, and MaxChi algorithms to both detect recombination events and verify  
476 events identified by other algorithms (Martin and Rybicki, 2000; Padidam et al., 1999; Posada

477 and Crandall, 2001; Smith, 1992). The algorithms BootScan, SiScan, and 3Seq are  
478 computationally intensive when used to detect new events and so are only used to verify other  
479 events when using the default settings (Boni et al., 2007; Gibbs et al., 2000; Martin et al., 2005).  
480 Putative events detected by RDP were subjected to manual review with apparently false  
481 positive events (those due to sequence misalignment or in regions of poor sequence quality)  
482 excluded from further analyses.

483         This process was then performed for 230 HSV-2 sequences that had not previously been  
484 analyzed for recombination with each sequence aligned to HSV-1 KOS (JQ673480) and the ChHV  
485 reference (NC\_023677).

486

#### 487 *Novel Recombination Event Verification*

488         We confirmed novel recombination events observed in just one sample by performing  
489 Sanger sequencing across the entire event or across each of the two breakpoints, depending on  
490 the size of the event, directly from the original sample swab. Additional samples from persons  
491 with novel recombination events were sequenced when such samples were available to further  
492 confirm the recombination event and to examine the stability of the novel recombinant *in vivo*.

493

#### 494 *Phylogenetic Trees*

495         All phylogenetic trees were constructed using concatenated coding sequences from the  
496 genomic region of interest. Non-coding sequence was excluded due to the increased frequency  
497 of ambiguous base calls in these regions. The phylogenetic trees in Figures 1C, 1E, and 2C were  
498 created using MrBayes (Huelsenbeck and Ronquist, 2001) with a HKY85 substitution model,

499 gamma distribution for mutation rate variation across sites with 4 rate categories, chain length  
500 of 1,100,000, and burn-in length of 100,000. PHYML with a HKY85 substitution model was used  
501 to generate the trees in Figures 1D and 2D (Guindon et al., 2010). PHYML was used in place of  
502 MrBayes for the trees in 1D and 2D given the prolonged run time required by MrBayes for  
503 alignments of long sequences.

504 To better illustrate the full range of genomic variation in HSV-1 and HSV-2, we used all  
505 HSV genomes available in GenBank as of April 2018 in the generation of phylogenetic trees in  
506 addition to the newly-generated genome sequences. The accessions for the GenBank  
507 sequences are listed in Supplementary Tables 1 and 4. References for these sequences are as  
508 follows: HSV-1 Colgrove et al., 2016; Davison, 2011; Greninger et al., 2018; Kolb et al., 2011;  
509 Macdonald et al., 2012a, 2012b; Parsons et al., 2015; Szpara et al., 2014; Watson et al., 2012;  
510 HSV-2 Burrel et al., 2017; Colgrove et al., 2014; Johnston et al., 2017; Koelle et al., 2017; Kolb et  
511 al., 2015; Newman et al., 2015. Within the genomic regions of interest for each tree, only one  
512 sequence per unique genotype was used. For trees constructed from alignments of relatively  
513 short sequences (1C, 1E, and 2C), sequences with any ambiguous bases were excluded. For  
514 trees constructed from alignments of longer sequences (1D and 2D), sequences with greater  
515 than 10% ambiguous base calls were excluded.

516

#### 517 *Assignment of Genotypes for Recombinant Regions in UL29, UL30, UL39*

518 We assigned genotypes for the UL29, UL30, and UL39 recombinant regions (as described  
519 in Burrel et al., 2017; Koelle et al., 2017) to all newly-generated HSV-2 sequences plus all those  
520 available in GenBank as of April 2018. For UL29 and UL30, we assigned genotypes based on

521 each sample's nucleotide sequence in the recombinant region. For UL39, genotypes were  
522 assigned based on amino acid sequence given the large number of different nucleotide  
523 genotypes observed in the region. See Supplementary Note 2 for details on how genotypes  
524 were assigned.

525 For the purpose of reporting the frequencies of the genotypes at the UL29, UL30, and  
526 UL39 loci, we first excluded all HSV-2 sequences with missing data at all three loci of interest.  
527 Next, we separated out samples from Burrell et al., 2017 as these samples were selected for  
528 sequencing from a larger sample set because of their unusual (non-recombinant) UL30  
529 sequence (and therefore, the frequency of recombinant genotypes particularly at the UL30  
530 locus in this set cannot be considered to approximate their true frequency in the represented  
531 geographic areas). We scanned these sequences for rare recombinant genotypes but did not  
532 include them in our calculations of the frequencies of common recombinant and non-  
533 recombinant genotypes. Finally, from the remaining sequences, we selected a subset which  
534 included just one sample per person. This left us with a total of 213 sequences for which we  
535 report genotype frequencies. Note that for individuals with HSV-2 superinfection (as noted in  
536 Supplementary Table 4) this means that only one of their HSV-2 strains was considered in the  
537 reported genotype frequencies.

538

### 539 *Structural Analyses*

540 Depictions of the protein products of HSV-1 UL29 (ssDNA binding protein, ICP8) and  
541 HSV-1 UL30 (DNA polymerase) as determined by x-ray crystallography (Liu et al., 2006; Mapelli



542 et al., 2005) were uploaded into Chimera (Pettersen et al., 2004), which was used to highlight  
543 the structures corresponding to genic regions affected by interspecies recombination.

544 We used HHPred to search for the protein with known structure that had the greatest  
545 predicted structural homology to the UL39 protein product (ribonuclease reductase) in the  
546 Research Collaboratory for Structural Bioinformatics protein database (RCSB PDB) (Berman et  
547 al., 2000). The best hit, regardless of which HSV protein sequence was used for UL39, was the  
548 large subunit of the yeast ribonuclease reductase (Xu et al., 2006). The region of this protein  
549 corresponding to the recombinant genic region was highlighted using Chimera as above.

550

#### 551 *T-Cell Analysis*

552 Informed written consent was obtained from subjects contributing T-cells and viral  
553 isolates. The consent process for autopsy-derived T-cells has been documented (van Velzen et  
554 al., 2013). Lab HSV-2 strains 186 (JX112656) (Anderson et al., 1980) and HG52 (JN561323),  
555 (Harland and Brown, 1985), lab HSV-1 strain E115 (Spruance and Chow, 1980), and HSV-2  
556 sample 1996\_26333 (MH790638) were grown and titered on Vero cells. Both strain 186 and  
557 HG52 have the common recombinant or CR genotype at UL30. Full-length UL30 of HSV-1 strain  
558 17 and HSV-2 strain 186 were cloned into pDEST103 and expressed by transient transfection of  
559 Cos-7 cells as described (Jing et al., 2012; Johnston et al., 2014). For HSV-2 UL30 NR, we  
560 similarly cloned full-length UL30 from HSV-2 sample 2008\_15116 (MF621257) (Johnston et al.,  
561 2017) with the same PCR primers used for HSV-2 strain 186 (Johnston et al., 2014). Accurate  
562 amplification was confirmed by sequencing and UL30 was subcloned into pDEST103 after initial  
563 cloning into pENTR221 (Jing et al., 2012). UL30 of HSV-1 17, HSV-2 186, and HSV-2 2008\_15116

564 were also cloned into pDEST203 and expressed by in vitro transcription/translation (IVTT) as  
565 described (Jing et al., 2012). HSV-specific T-cell clones 9447.28, 1874.1991.22, and  
566 5101.1999.23 (Supplementary Table 5) from Seattle donors have been described (Dong et al.,  
567 2010; Koelle et al., 2001, 2000). Polyclonal, mono-specific, HSV-specific CD8 T-cells were  
568 enriched from T-cells expanded from autopsy HSV-1-infected trigeminal ganglia TG3 using  
569 tetramers of HLA A\*0101 and either HSV-1 UL48 AA 90-99 or HSV-1 UL48 AA 479-488, as  
570 published (van Velzen et al., 2013). Live cells positive for CD3, CD8, and tetramer were sorted  
571 (FacsAria II, Becton Dickinson) and expanded polyclonally (Koelle et al., 2001). To obtain bulk  
572 HSV-specific CD4 T-cells, HSV-1-reactive CD4 T-cells were enriched from PBMC from a Seattle  
573 HSV-1 seropositive, HSV-2 seronegative donor with no clinical history of herpes infection, as  
574 published (Jing et al., 2012). Epstein-Barr virus-transformed lymphocyte continuous lines (LCL)  
575 from persons of defined HLA type were cultured as described (Tigges et al., 1992) for use as  
576 antigen-presenting cells (APC). For functional readouts of CD8 T-cells and cloned CD4 T-cells,  
577 LCL were infected overnight with HSV and then co-cultured for an additional 24 hours with T-  
578 cells (50,000 LCL and 50,000 T-cells/well in 200  $\mu$ L in triplicate). Supernatants were then  
579 assayed for IFN $\gamma$  by ELISA (Koelle et al., 2001). For polyclonal CD4 T-cells, a triplicate  $^3$ H  
580 thymidine incorporation proliferation assay used autologous, irradiated PBMC as APC and  
581 responder T-cells (100,000 each in 200  $\mu$ l/well final volumes) as published (Johnston et al.,  
582 2014). Antigens were sonicated, transfected Cos-7 cells or sonicated, UV-killed HSV-infected  
583 Vero cell preparations at final dilutions of 1:100, or IVTT protein preparations at 1:1000.

584

585

## 586 **Acknowledgements**

587           We would like to thank the clinical study participants from whom HSV samples were  
588 collected. We would also like to thank local study teams at the international sites in Cameroon,  
589 Peru, Senegal, and Uganda. At the Senegal site, we thank Marie-Pierre Sy for swab collection. At  
590 UW, we would like to thank Chris McClurkan and Marliis Ott for assistance with T-cell  
591 experiments.

592

## 593 **Figures**

594 **Figure 1: UL29 – UL31 Recombinant.** A) Schematic showing the size and position of the  
595 recombination event relative to the HSV-2 genome and within its genic neighborhood. Green  
596 represents coding regions and purple represents non-coding regions. The recombinant region is  
597 represented by a blue bar. B) List of all sequenced samples collected from the person carrying  
598 the UL29 – UL31 recombinant with the day of sample collection relative to the collection date  
599 of the first sample. C) Phylogenetic tree of the recombinant region extracted from HSV-1  
600 sequences and from the UL29 – UL31 recombinant. The bar below the tree shows the extracted  
601 region (colored in bright blue) relative to the rest of the genome (faded out). The branch  
602 representing the UL29-UL31 recombinants is marked with blue circle. D) Phylogenetic tree of all  
603 coding sequences (concatenated) excluding UL29, UL30, and UL31 extracted from HSV-2  
604 sequences. The bar below the tree shows the extracted regions (colored in bright green)  
605 relative to the rest of the genome (faded out). All 3 HSV-2 sequences from the person carrying  
606 the UL29 – UL31 recombinant clustered on the branch marked with the blue circle. E)  
607 Phylogenetic tree of the UL30 recombinant region extracted from HSV-1 sequences, HSV-2

608 sequences with the UL30 CR genotype, and HSV-2 sequences with the UL29 – UL31  
609 recombination event. The bar below the tree shows the extracted region (colored in bright  
610 blue) relative to the rest of the genome (faded out). The UL29 – UL31 recombinant branch is  
611 marked with a blue circle. HSV-1 branches are marked in orange and HSV-2 branches are  
612 marked in green.

613 **Figure 2: UL47 – UL50 Recombinant.** A) Schematic showing the size and position of the  
614 recombination event relative to the HSV-2 genome and within its genic neighborhood. Green  
615 represents coding regions and purple represents non-coding regions. The recombinant region is  
616 represented by a blue bar. B) List of all sequenced samples collected from the person carrying  
617 the UL47 – UL50 recombinant with the day of sample collection relative to the collection date  
618 of the first sample. C) Phylogenetic tree of the recombinant region extracted from all HSV-1 and  
619 HSV-2 sequences. The bar below the tree shows the extracted region (colored in bright blue)  
620 relative to the rest of the genome (faded out). The branches marked with colored circles  
621 represent the position in the tree of the various samples collected from the person carrying the  
622 UL47 – UL50 recombinant. These colors correspond to those in the table in B. D) Phylogenetic  
623 tree of all coding sequences (concatenated) excluding UL47, UL48, UL49, UL49a, and UL50  
624 extracted from all HSV sequences. The bar below the tree shows the extracted regions (colored  
625 in bright green) relative to the rest of the genome (faded out). The branches marked with  
626 colored circles represent the position in the tree of the various samples collected from the  
627 person carrying the UL47 – UL50 recombinant. These colors correspond to those in the table in  
628 B.

629 **Figure 3: UL29 Recombinant Region.** A) Schematic showing the HSV-1 sequence blocks for each  
630 UL29 recombinant genotype. HSV-1 sequence is colored in blue. ChHV/non-recombinant HSV-2  
631 coding sequence is colored in green. Intergenic regions are purple. Letters denote amino acids  
632 that differ among the various genotypes and vertical lines above the HSV-1 row denote the  
633 location of nucleotides that differ among the various genotypes ("genotype-defining" SNPs, see  
634 Supplementary Note 2). The top bar represents the entire HSV-2 genome while the second bar  
635 represents the region of the genome containing UL29. Of note, the UL29 gene is oriented in the  
636 reverse direction. The orientation of the second bar and the genotype bars are flipped relative  
637 to the full genome bar. B) Number of samples from each geographic region with the NR, CR,  
638 and rare genotypes. MD denotes samples with missing data. Note that samples LT797622 –  
639 LT797636, LT797682, LT797786, LT799380 (samples from Burrell et al., 2017) were not included  
640 in these counts. C) Crystal protein structure of the UL29 gene product, ICP8, the HSV single  
641 stranded DNA binding protein. The part of the protein encoded by the recombinant region is  
642 highlighted in blue.

643 **Figure 4: UL30 Recombinant Region.** A) Schematic showing the HSV-1 sequence blocks for each  
644 UL30 recombinant genotype. HSV-1 sequence is colored in blue. ChHV/non-recombinant HSV-2  
645 coding sequence is colored in green. Intergenic regions are purple. Letters denote amino acids  
646 that differ among the various genotypes and vertical lines above the HSV-1 row denote the  
647 location of nucleotides that differ among the various genotypes. The top bar represents the  
648 entire HSV-2 genome while the second bar represents the region of the genome containing  
649 UL30. B) Number of samples from each geographic region with the NR, CR, and rare genotypes.  
650 MD denotes samples with missing data. Note that samples LT797622 – LT797636, LT797682,

651 LT797786, LT799380 (samples from Burrel et al., 2017) were not included in these counts. C)  
652 Crystal protein structure of the UL30 gene product, the HSV DNA polymerase. The part of the  
653 protein encoded by the recombinant region is highlighted in blue.

654 **Figure 5: UL39 Recombinant Region.** A) Schematic showing the HSV-1 sequence blocks for each  
655 UL39 recombinant genotype. HSV-1 sequence is colored in blue. ChHV/non-recombinant HSV-2  
656 coding sequence is colored in green. Intergenic regions are purple. Letters denote amino acids  
657 that differ among the various genotypes and vertical lines above the HSV-1 row denote the  
658 location of nucleotides that differ among the various genotypes. The top bar represents the  
659 entire HSV-2 genome while the second bar represents the region of the genome containing  
660 UL39. Asterix (\*) in NR genotype can be amino acid S or C depending on the sample. B) Number  
661 of sequences from each geographic region with the NR, CR, and rare genotypes. MD denotes  
662 sequences with missing data. Note that samples LT797622 – LT797636, LT797682, LT797786,  
663 LT799380 (sample from Burrel et al., 2017) were not included in these counts. C) Crystal protein  
664 structure of the UL39 gene product, the ribonuclease reductase (structure is of yeast  
665 ribonucleotide reductase). The part of the protein encoded by the recombinant region is  
666 highlighted in blue.

667 **Figure 6: Differential recognition of HSV-1 x HSV-2 interspecies recombinants by HSV-specific**  
668 **T-cells.** A) Polyclonal HSV-1-reactive CD4 T-cells from HSV-1-infected persons recognize UL30  
669 expressed in either Cos-7 or IVTT systems from HSV-1 and HSV-2 UL30 CR, but not from HSV-2  
670 UL30 NR genotype. Readout is T-cell proliferation. B) UL47 C-Terminal epitope-specific CD8 T-  
671 cell clone recognizes HSV-2 UL47-UL50 recombinant and non-recombinant HSV-2 but not HSV-  
672 1. C) UL47 N-Terminal epitope-specific CD8 T-cell clone recognizes non-recombinant HSV-2 but

673 not HSV-1 or HSV-2 UL47-UL50 recombinant. D) UL48 N-terminal epitope-specific CD8 T-cell line  
674 recognizes HSV-1 and HSV-2 UL47-UL50 recombinant but not non-recombinant HSV-2. E) UL48  
675 C-terminal epitope-specific CD8 T-cell line clone recognizes HSV-1 and HSV-2 UL47-UL50  
676 recombinant but not non-recombinant HSV-2. F) UL49-specific CD4 T-cell clone recognizes HSV-  
677 1, non-recombinant HSV-2, and the HSV-2 UL47-UL50 recombinant. Data are secreted IFN- $\gamma$ . All  
678 assays are triplicate.

679

680

## 681 **References**

- 682 Anderson CA, August MJ, Hsiung GD. 1980. Pathogenicity of wild-type and temperature-sensitive  
683 mutants of herpes simplex virus type 2 in guinea pigs. *Infect Immun* **30**:159–169.
- 684 Berman HM, Westbrook J, Feng Z, Gilliland G, Bhat TN, Weissig H, Shindyalov IN, Bourne PE. 2000. The  
685 Protein Data Bank. *Nucleic Acids Res* **28**:235–242.
- 686 Boni MF, Posada D, Feldman MW. 2007. An exact nonparametric method for inferring mosaic structure  
687 in sequence triplets. *Genetics* **176**:1035–1047. doi:10.1534/genetics.106.068874
- 688 Burrel S, Boutolleau D, Ryu D, Agut H, Merkel K, Leendertz FH, Calvignac-Spencer S. 2017. Ancient  
689 Recombination Events between Human Herpes Simplex Viruses. *Mol Biol Evol* **34**:1713–1721.  
690 doi:10.1093/molbev/msx113
- 691 Burrel S, Désiré N, Marlet J, Dacheux L, Seang S, Caumes E, Bourhy H, Agut H, Boutolleau D. 2015.  
692 Genetic Diversity within Alphaherpesviruses: Characterization of a Novel Variant of Herpes  
693 Simplex Virus 2. *J Virol* **89**:12273–12283. doi:10.1128/JVI.01959-15
- 694 Chiam C-W, Chan Y-F, Sam I-C. 2010. Changing trends of genital herpes in Kuala Lumpur, Malaysia, 1982-  
695 2008. *Int J STD AIDS* **21**:450–451. doi:10.1258/ijsa.2010.009569
- 696 Colgrove R, Diaz F, Newman R, Saif S, Shea T, Young S, Henn M, Knipe DM. 2014. Genomic sequences of  
697 a low passage herpes simplex virus 2 clinical isolate and its plaque-purified derivative strain.  
698 *Virology* **450–451**:140–145. doi:10.1016/j.virol.2013.12.014
- 699 Colgrove RC, Liu X, Griffiths A, Raja P, Deluca NA, Newman RM, Coen DM, Knipe DM. 2016. History and  
700 genomic sequence analysis of the herpes simplex virus 1 KOS and KOS1.1 sub-strains. *Virology*  
701 **487**:215–221. doi:10.1016/j.virol.2015.09.026
- 702 Conner J, Cross A, Murray J, Marsden H. 1994. Identification of structural domains within the large  
703 subunit of herpes simplex virus ribonucleotide reductase. *J Gen Virol* **75 ( Pt 12)**:3327–3335.  
704 doi:10.1099/0022-1317-75-12-3327
- 705 Corey L, Adams HG, Brown ZA, Holmes KK. 1983. Genital herpes simplex virus infections: clinical  
706 manifestations, course, and complications. *Ann Intern Med* **98**:958–972.
- 707 Corey L, Huang M-L, Selke S, Wald A. 2005. Differentiation of herpes simplex virus types 1 and 2 in  
708 clinical samples by a real-time taqman PCR assay. *J Med Virol* **76**:350–355.  
709 doi:10.1002/jmv.20365

- 710 Corey L, Wald A. 2009. Maternal and neonatal herpes simplex virus infections. *N Engl J Med* **361**:1376–  
711 1385. doi:10.1056/NEJMra0807633
- 712 Davison AJ. 2011. Evolution of sexually transmitted and sexually transmissible human herpesviruses. *Ann*  
713 *N Y Acad Sci* **1230**:E37-49. doi:10.1111/j.1749-6632.2011.06358.x
- 714 Dong L, Li P, Oenema T, McClurkan CL, Koelle DM. 2010. Public TCR use by herpes simplex virus-2-  
715 specific human CD8 CTLs. *J Immunol Baltim Md 1950* **184**:3063–3071.  
716 doi:10.4049/jimmunol.0903622
- 717 Gibbs MJ, Armstrong JS, Gibbs AJ. 2000. Sister-scanning: a Monte Carlo procedure for assessing signals  
718 in recombinant sequences. *Bioinforma Oxf Engl* **16**:573–582.
- 719 Gilbert M, Li X, Petric M, Kraiden M, Isaac-Renton JL, Ogilvie G, Rekart ML. 2011. Using centralized  
720 laboratory data to monitor trends in herpes simplex virus type 1 and 2 infection in British  
721 Columbia and the changing etiology of genital herpes. *Can J Public Health Rev Can Sante*  
722 *Publique* **102**:225–229.
- 723 Gottlieb SL, Deal CD, Giersing B, Rees H, Bolan G, Johnston C, Timms P, Gray-Owen SD, Jerse AE,  
724 Cameron CE, Moorthy VS, Kiarie J, Broutet N. 2016. The global roadmap for advancing  
725 development of vaccines against sexually transmitted infections: Update and next steps. *Vaccine*  
726 **34**:2939–2947. doi:10.1016/j.vaccine.2016.03.111
- 727 Greninger AL, Roychoudhury P, Xie H, Casto A, Cent A, Pepper G, Koelle DM, Huang M-L, Wald A,  
728 Johnston C, Jerome KR. 2018. Ultrasensitive Capture of Human Herpes Simplex Virus Genomes  
729 Directly from Clinical Samples Reveals Extraordinarily Limited Evolution in Cell Culture. *mSphere*  
730 **3**. doi:10.1128/mSphereDirect.00283-18
- 731 Guindon S, Dufayard J-F, Lefort V, Anisimova M, Hordijk W, Gascuel O. 2010. New algorithms and  
732 methods to estimate maximum-likelihood phylogenies: assessing the performance of PhyML  
733 3.0. *Syst Biol* **59**:307–321. doi:10.1093/sysbio/syq010
- 734 Halliburton IW. 1980. Intertypic recombinants of herpes simplex viruses. *J Gen Virol* **48**:1–23.  
735 doi:10.1099/0022-1317-48-1-1
- 736 Harland J, Brown SM. 1985. Isolation and characterization of deletion mutants of herpes simplex virus  
737 type 2 (strain HG52). *J Gen Virol* **66 ( Pt 6)**:1305–1321. doi:10.1099/0022-1317-66-6-1305
- 738 Harpaz R, Dahl RM, Dooling KL. 2016. Prevalence of Immunosuppression Among US Adults, 2013. *JAMA*  
739 **316**:2547–2548. doi:10.1001/jama.2016.16477
- 740 Huelsenbeck JP, Ronquist F. 2001. MRBAYES: Bayesian inference of phylogenetic trees. *Bioinforma Oxf*  
741 *Engl* **17**:754–755.
- 742 Jing L, Haas J, Chong TM, Bruckner JJ, Dann GC, Dong L, Marshak JO, McClurkan CL, Yamamoto TN, Bailer  
743 SM, Laing KJ, Wald A, Verjans GMGM, Koelle DM. 2012. Cross-presentation and genome-wide  
744 screening reveal candidate T cells antigens for a herpes simplex virus type 1 vaccine. *J Clin Invest*  
745 **122**:654–673. doi:10.1172/JCI60556
- 746 Johnson KE, Redd AD, Quinn TC, Collinson-Streng AN, Cornish T, Kong X, Sharma R, Tobian AAR, Tsai B,  
747 Sherman ME, Kigozi G, Serwadda D, Wawer MJ, Gray RH. 2011. Effects of HIV-1 and herpes  
748 simplex virus type 2 infection on lymphocyte and dendritic cell density in adult foreskins from  
749 Rakai, Uganda. *J Infect Dis* **203**:602–609. doi:10.1093/infdis/jiq091
- 750 Johnston C, Margaret A, Roychoudhury P, Greninger AL, Reeves D, Schiffer J, Jerome KR, Sather C, Diem  
751 K, Lingappa JR, Celum C, Koelle DM, Wald A. 2017. Dual-strain genital herpes simplex virus type  
752 2 (HSV-2) infection in the US, Peru, and 8 countries in sub-Saharan Africa: A nested cross-  
753 sectional viral genotyping study. *PLoS Med* **14**:e1002475. doi:10.1371/journal.pmed.1002475
- 754 Johnston C, Zhu J, Jing L, Laing KJ, McClurkan CM, Klock A, Diem K, Jin L, Stanaway J, Tronstein E, Kwok  
755 WW, Huang M-L, Selke S, Fong Y, Margaret A, Koelle DM, Wald A, Corey L. 2014. Virologic and  
756 immunologic evidence of multifocal genital herpes simplex virus 2 infection. *J Virol* **88**:4921–  
757 4931. doi:10.1128/JVI.03285-13



- 758 Katoh K, Standley DM. 2013. MAFFT multiple sequence alignment software version 7: improvements in  
759 performance and usability. *Mol Biol Evol* **30**:772–780. doi:10.1093/molbev/mst010
- 760 Koelle DM, Chen HB, Gavin MA, Wald A, Kwok WW, Corey L. 2001. CD8 CTL from genital herpes simplex  
761 lesions: recognition of viral tegument and immediate early proteins and lysis of infected  
762 cutaneous cells. *J Immunol Baltim Md 1950* **166**:4049–4058.
- 763 Koelle DM, Norberg P, Fitzgibbon MP, Russell RM, Greninger AL, Huang M-L, Stensland L, Jing L, Margaret  
764 AS, Diem K, Selke S, Xie H, Celum C, Lingappa JR, Jerome KR, Wald A, Johnston C. 2017.  
765 Worldwide circulation of HSV-2 and HSV-1 recombinant strains. *Sci Rep* **7**:44084.  
766 doi:10.1038/srep44084
- 767 Koelle DM, Raymond SN, Chen H, Kwok WW, McClurkan C, Gyaltson T, Petersdorf EW, Rotkis W, Talley  
768 AR, Harrison DA. 2000. Tegument-specific, virus-reactive CD4 T cells localize to the cornea in  
769 herpes simplex virus interstitial keratitis in humans. *J Virol* **74**:10930–10938.
- 770 Kolb AW, Adams M, Cabot EL, Craven M, Brandt CR. 2011. Multiplex sequencing of seven ocular herpes  
771 simplex virus type-1 genomes: phylogeny, sequence variability, and SNP distribution. *Invest*  
772 *Ophthalmol Vis Sci* **52**:9061–9073. doi:10.1167/iops.11-7812
- 773 Kolb AW, Larsen IV, Cuellar JA, Brandt CR. 2015. Genomic, phylogenetic, and recombinational  
774 characterization of herpes simplex virus 2 strains. *J Virol* **89**:6427–6434. doi:10.1128/JVI.00416-  
775 15
- 776 Liu S, Knafels JD, Chang JS, Waszak GA, Baldwin ET, Deibel MR, Thomsen DR, Homa FL, Wells PA, Tory  
777 MC, Poorman RA, Gao H, Qiu X, Seddon AP. 2006. Crystal structure of the herpes simplex virus 1  
778 DNA polymerase. *J Biol Chem* **281**:18193–18200. doi:10.1074/jbc.M602414200
- 779 Looker KJ, Margaret AS, May MT, Turner KME, Vickerman P, Gottlieb SL, Newman LM. 2015a. Global and  
780 Regional Estimates of Prevalent and Incident Herpes Simplex Virus Type 1 Infections in 2012.  
781 *PLoS One* **10**:e0140765. doi:10.1371/journal.pone.0140765
- 782 Looker KJ, Margaret AS, Turner KME, Vickerman P, Gottlieb SL, Newman LM. 2015b. Global estimates of  
783 prevalent and incident herpes simplex virus type 2 infections in 2012. *PLoS One* **10**:e114989.  
784 doi:10.1371/journal.pone.0114989
- 785 Macdonald SJ, Mostafa HH, Morrison LA, Davido DJ. 2012a. Genome sequence of herpes simplex virus 1  
786 strain KOS. *J Virol* **86**:6371–6372. doi:10.1128/JVI.00646-12
- 787 Macdonald SJ, Mostafa HH, Morrison LA, Davido DJ. 2012b. Genome sequence of herpes simplex virus 1  
788 strain McKrae. *J Virol* **86**:9540–9541. doi:10.1128/JVI.01469-12
- 789 Mapelli M, Panjekar S, Tucker PA. 2005. The crystal structure of the herpes simplex virus 1 ssDNA-binding  
790 protein suggests the structural basis for flexible, cooperative single-stranded DNA binding. *J Biol*  
791 *Chem* **280**:2990–2997. doi:10.1074/jbc.M406780200
- 792 Martin D, Rybicki E. 2000. RDP: detection of recombination amongst aligned sequences. *Bioinforma Oxf*  
793 *Engl* **16**:562–563.
- 794 Martin DP, Murrell B, Golden M, Khoosal A, Muhire B. 2015. RDP4: Detection and analysis of  
795 recombination patterns in virus genomes. *Virus Evol* **1**:vev003. doi:10.1093/ve/vev003
- 796 Martin DP, Posada D, Crandall KA, Williamson C. 2005. A modified bootscan algorithm for automated  
797 identification of recombinant sequences and recombination breakpoints. *AIDS Res Hum*  
798 *Retroviruses* **21**:98–102. doi:10.1089/aid.2005.21.98
- 799 Masee L, Baeten JM, Richardson BA, Bukusi E, John-Stewart G, Graham SM, Shafi J, Kiarie J, Overbaugh  
800 J, McClelland RS. 2015. Changes in the contribution of genital tract infections to HIV acquisition  
801 among Kenyan high-risk women from 1993 to 2012. *AIDS Lond Engl* **29**:1077–1085.  
802 doi:10.1097/QAD.0000000000000646
- 803 Morse LS, Buchman TG, Roizman B, Schaffer PA. 1977. Anatomy of herpes simplex virus DNA. IX.  
804 Apparent exclusion of some parental DNA arrangements in the generation of intertypic (HSV-1 X  
805 HSV-2) recombinants. *J Virol* **24**:231–248.

- 806 Newman RM, Lamers SL, Weiner B, Ray SC, Colgrove RC, Diaz F, Jing L, Wang K, Saif S, Young S, Henn M,  
807 Laeyendecker O, Tobian AAR, Cohen JI, Koelle DM, Quinn TC, Knipe DM. 2015. Genome  
808 Sequencing and Analysis of Geographically Diverse Clinical Isolates of Herpes Simplex Virus 2. *J*  
809 *Viro* **89**:8219–8232. doi:10.1128/JVI.01303-15
- 810 Padidam M, Sawyer S, Fauquet CM. 1999. Possible emergence of new geminiviruses by frequent  
811 recombination. *Virology* **265**:218–225. doi:10.1006/viro.1999.0056
- 812 Parsons LR, Tafuri YR, Shreve JT, Bowen CD, Shipley MM, Enquist LW, Szpara ML. 2015. Rapid genome  
813 assembly and comparison decode intrastrain variation in human alphaherpesviruses. *mBio* **6**.  
814 doi:10.1128/mBio.02213-14
- 815 Pettersen EF, Goddard TD, Huang CC, Couch GS, Greenblatt DM, Meng EC, Ferrin TE. 2004. UCSF  
816 Chimera—a visualization system for exploratory research and analysis. *J Comput Chem* **25**:1605–  
817 1612. doi:10.1002/jcc.20084
- 818 Posada D, Crandall KA. 2001. Evaluation of methods for detecting recombination from DNA sequences:  
819 computer simulations. *Proc Natl Acad Sci U S A* **98**:13757–13762. doi:10.1073/pnas.241370698
- 820 Ryder N, Jin F, McNulty AM, Grulich AE, Donovan B. 2009. Increasing role of herpes simplex virus type 1  
821 in first-episode anogenital herpes in heterosexual women and younger men who have sex with  
822 men, 1992–2006. *Sex Transm Infect* **85**:416–419. doi:10.1136/sti.2008.033902
- 823 Salvucci LA, Bonneau RH, Tevethia SS. 1995. Polymorphism within the herpes simplex virus (HSV)  
824 ribonucleotide reductase large subunit (ICP6) confers type specificity for recognition by HSV  
825 type 1-specific cytotoxic T lymphocytes. *J Virol* **69**:1122–1131.
- 826 Sauerbrei A, Bohn-Wippert K, Kaspar M, Krumbholz A, Karrasch M, Zell R. 2016. Database on natural  
827 polymorphisms and resistance-related non-synonymous mutations in thymidine kinase and DNA  
828 polymerase genes of herpes simplex virus types 1 and 2. *J Antimicrob Chemother* **71**:6–16.  
829 doi:10.1093/jac/dkv285
- 830 Severini A, Tyler SD, Peters GA, Black D, Eberle R. 2013. Genome sequence of a chimpanzee herpesvirus  
831 and its relation to other primate alphaherpesviruses. *Arch Virol* **158**:1825–1828.  
832 doi:10.1007/s00705-013-1666-y
- 833 Smith JM. 1992. Analyzing the mosaic structure of genes. *J Mol Evol* **34**:126–129.
- 834 Spruance SL, Chow FS. 1980. Pathogenesis of herpes simplex labialis. I. Replication of herpes simplex  
835 virus in cultures of epidermal cells from subjects with frequent recurrences. *J Infect Dis*  
836 **142**:671–675.
- 837 St Leger AJ, Peters B, Sidney J, Sette A, Hendricks RL. 2011. Defining the herpes simplex virus-specific  
838 CD8+ T cell repertoire in C57BL/6 mice. *J Immunol Baltim Md 1950* **186**:3927–3933.  
839 doi:10.4049/jimmunol.1003735
- 840 Szpara ML, Tafuri YR, Parsons L, Shreve JT, Engel EA, Enquist LW. 2014. Genome Sequence of the  
841 Anterograde-Spread-Defective Herpes Simplex Virus 1 Strain MacIntyre. *Genome Announc* **2**.  
842 doi:10.1128/genomeA.01161-14
- 843 Tigges MA, Koelle D, Hartog K, Sekulovich RE, Corey L, Burke RL. 1992. Human CD8+ herpes simplex  
844 virus-specific cytotoxic T-lymphocyte clones recognize diverse virion protein antigens. *J Virol*  
845 **66**:1622–1634.
- 846 Topalis D, Gillemot S, Snoeck R, Andrei G. 2016. Distribution and effects of amino acid changes in drug-  
847 resistant  $\alpha$  and  $\beta$  herpesviruses DNA polymerase. *Nucleic Acids Res* **44**:9530–9554.  
848 doi:10.1093/nar/gkw875
- 849 Tronstein E, Johnston C, Huang M-L, Selke S, Magaret A, Warren T, Corey L, Wald A. 2011. Genital  
850 shedding of herpes simplex virus among symptomatic and asymptomatic persons with HSV-2  
851 infection. *JAMA* **305**:1441–1449. doi:10.1001/jama.2011.420
- 852 van Diemen FR, Kruse EM, Hooykaas MJG, Bruggeling CE, Schürch AC, van Ham PM, Imhof SM, Nijhuis  
853 M, Wiertz EJHJ, Lebbink RJ. 2016. CRISPR/Cas9-Mediated Genome Editing of Herpesviruses

854 Limits Productive and Latent Infections. *PLoS Pathog* **12**:e1005701.  
855 doi:10.1371/journal.ppat.1005701  
856 van Velzen M, Jing L, Osterhaus ADME, Sette A, Koelle DM, Verjans GMGM. 2013. Local CD4 and CD8 T-  
857 cell reactivity to HSV-1 antigens documents broad viral protein expression and immune  
858 competence in latently infected human trigeminal ganglia. *PLoS Pathog* **9**:e1003547.  
859 doi:10.1371/journal.ppat.1003547  
860 Watson G, Xu W, Reed A, Babra B, Putman T, Wick E, Wechsler SL, Rohrmann GF, Jin L. 2012. Sequence  
861 and comparative analysis of the genome of HSV-1 strain McKrae. *Virology* **433**:528–537.  
862 doi:10.1016/j.virol.2012.08.043  
863 Wertheim JO, Smith MD, Smith DM, Scheffler K, Kosakovsky Pond SL. 2014. Evolutionary origins of  
864 human herpes simplex viruses 1 and 2. *Mol Biol Evol* **31**:2356–2364.  
865 doi:10.1093/molbev/msu185  
866 Xu H, Faber C, Uchiki T, Fairman JW, Racca J, Dealwis C. 2006. Structures of eukaryotic ribonucleotide  
867 reductase I provide insights into dNTP regulation. *Proc Natl Acad Sci U S A* **103**:4022–4027.  
868 doi:10.1073/pnas.0600443103  
869 Zhu J, Hladik F, Woodward A, Klock A, Peng T, Johnston C, Remington M, Magaret A, Koelle DM, Wald A,  
870 Corey L. 2009. Persistence of HIV-1 receptor-positive cells after HSV-2 reactivation is a potential  
871 mechanism for increased HIV-1 acquisition. *Nat Med* **15**:886–892. doi:10.1038/nm.2006  
872  
873  
874  
875  
876  
877  
878  
879  
880  
881  
882  
883  
884  
885  
886  
887  
888  
889  
890  
891  
892  
893  
894  
895  
896  
897  
898  
899

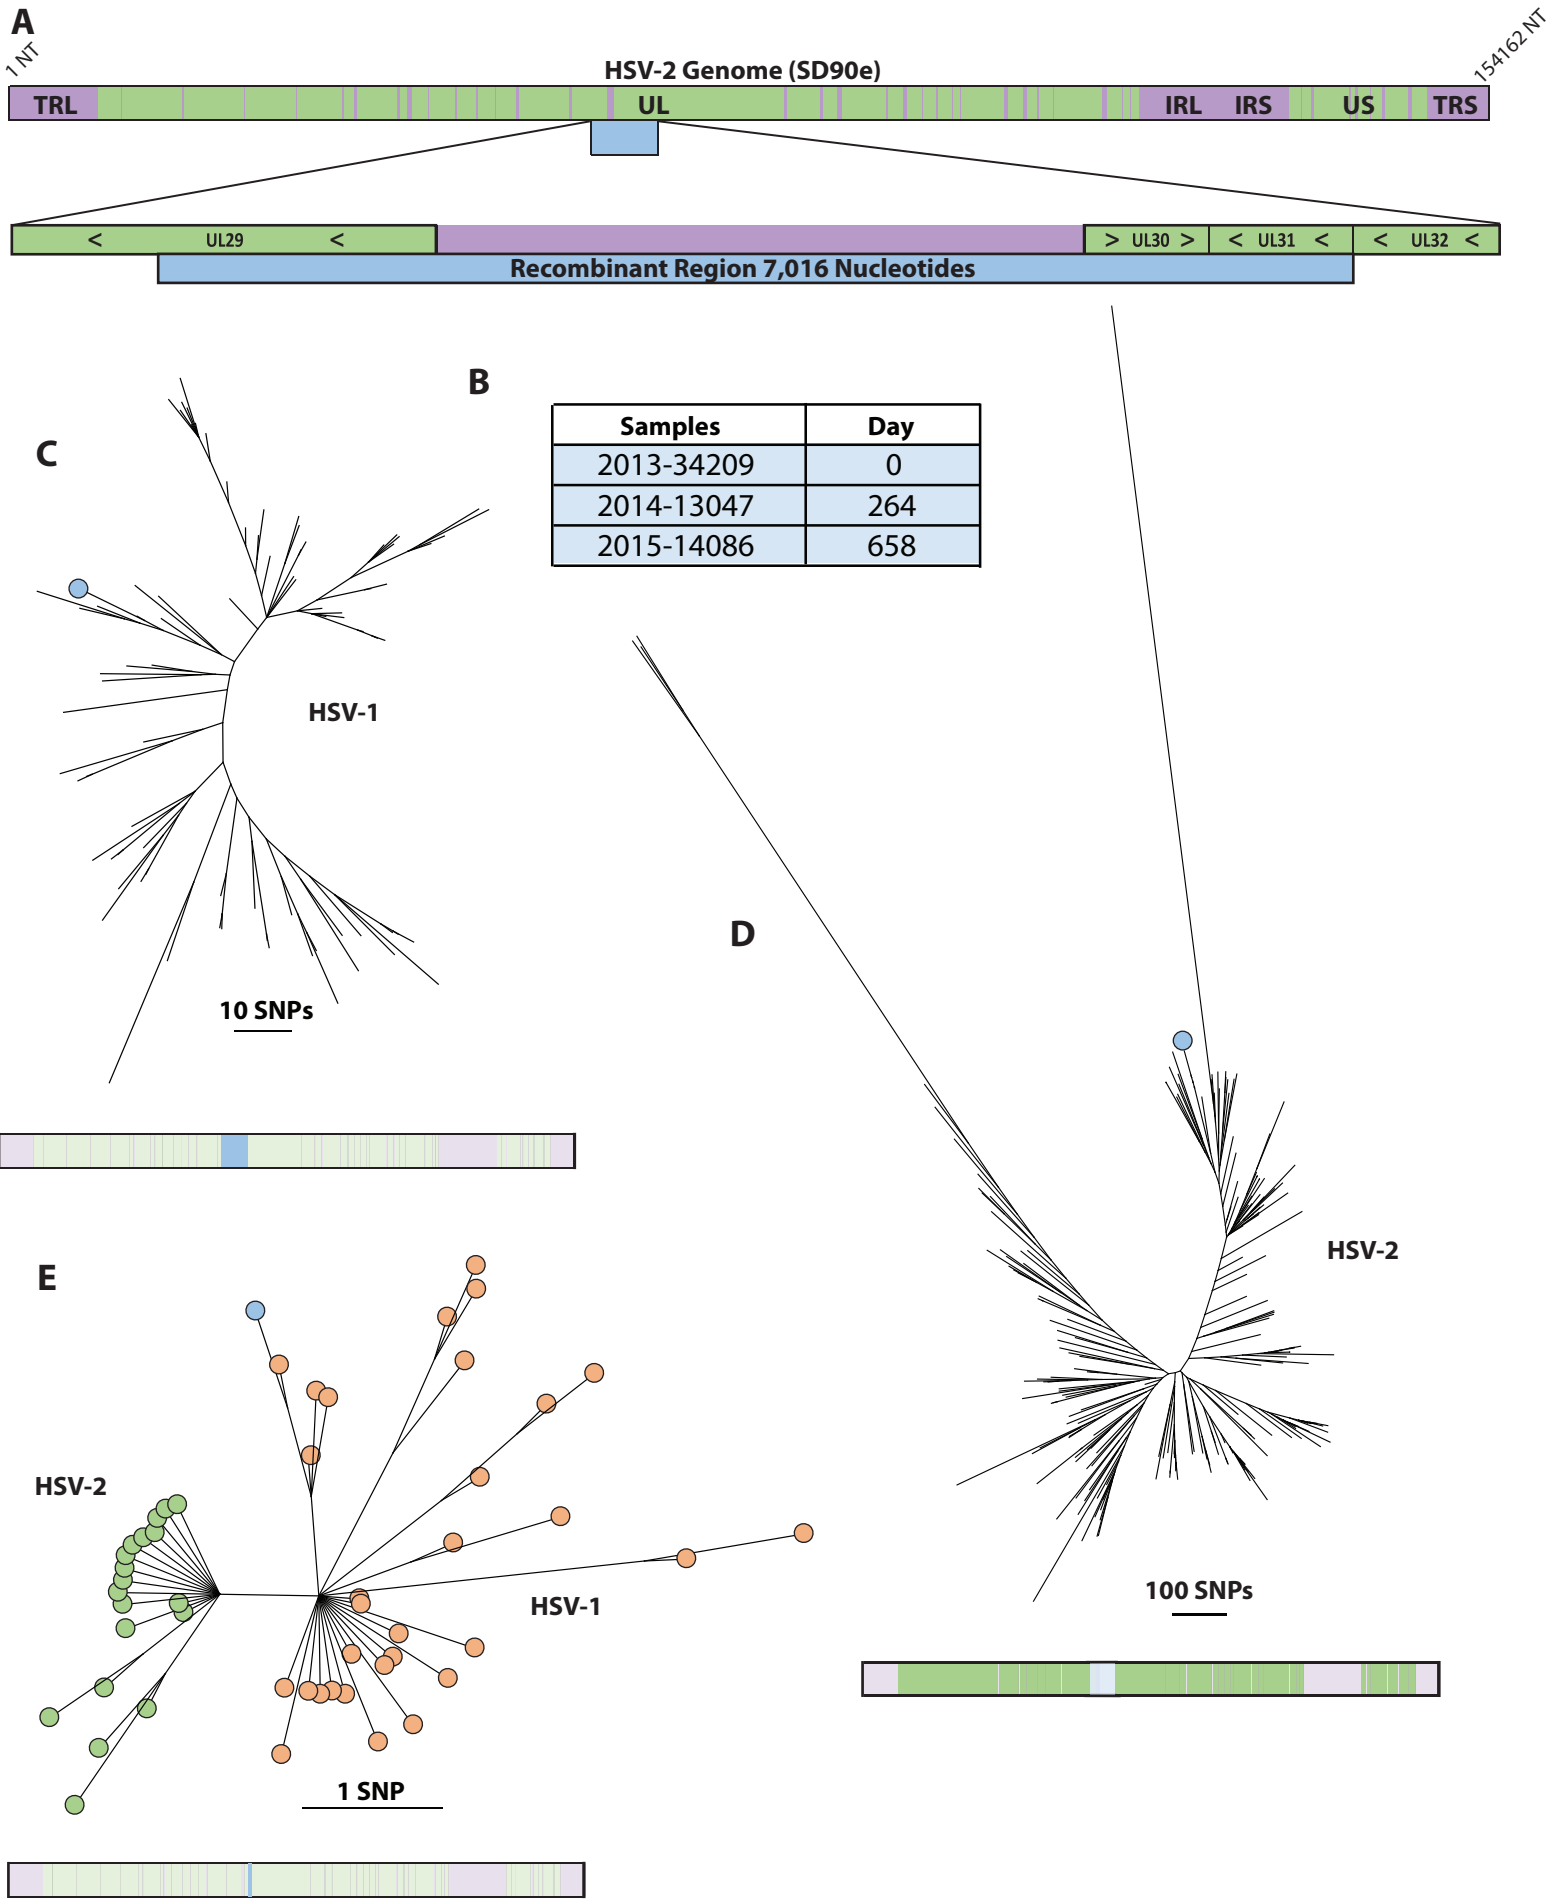

**A**

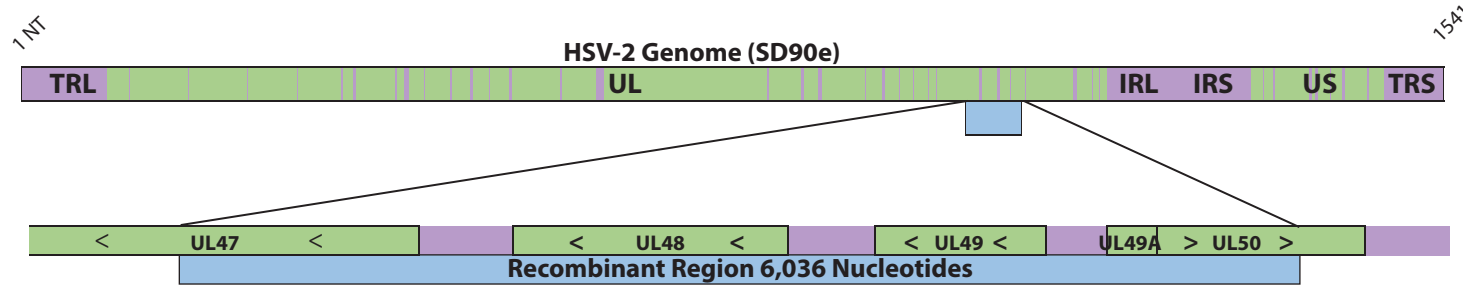

**B**

| Samples    | Day |
|------------|-----|
| 1995-63175 | 0   |
| 1995-56864 | 55  |
| 1995-57888 | 59  |
| 2018-5934  | 150 |
| 1996-26333 | 151 |

**C**

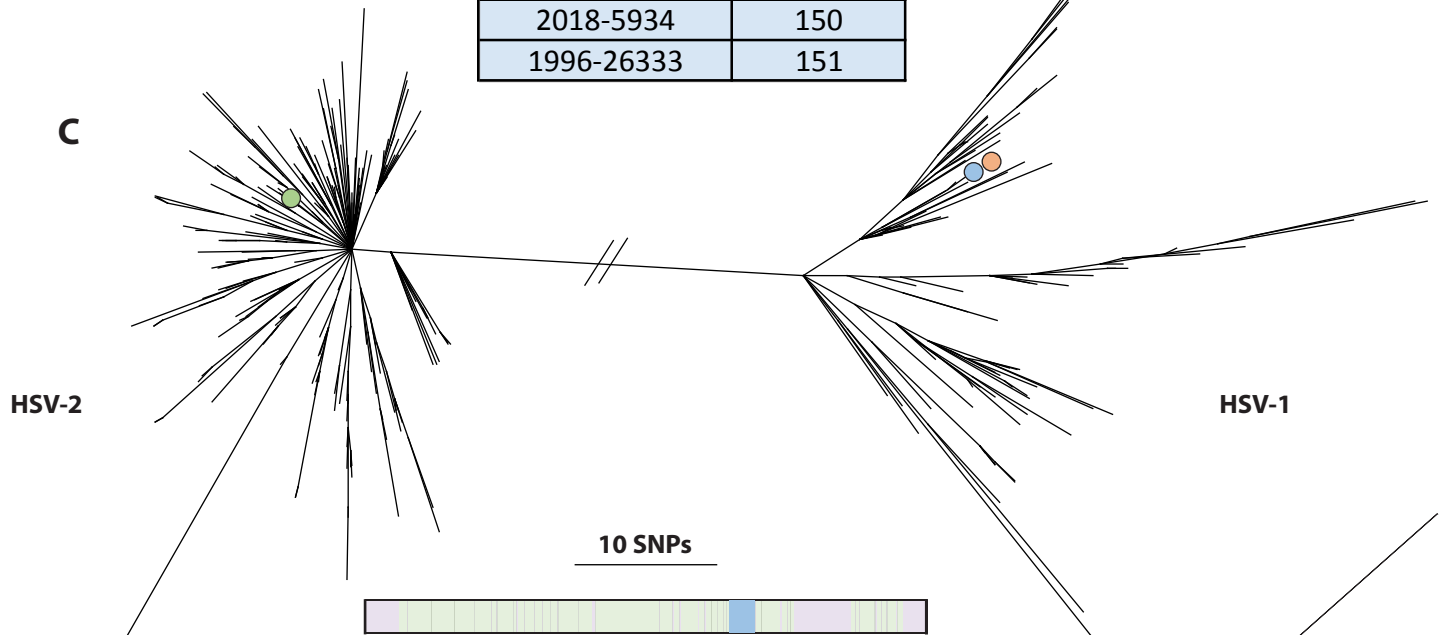

**D**

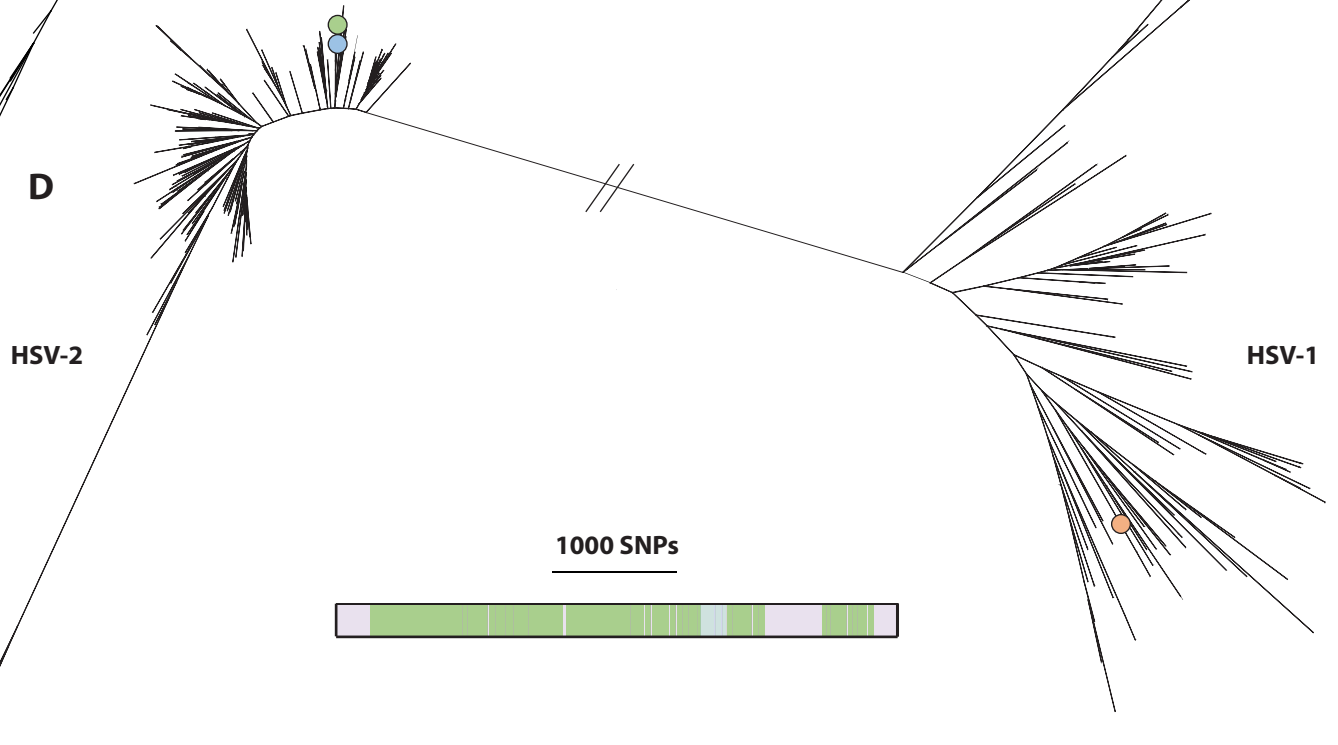

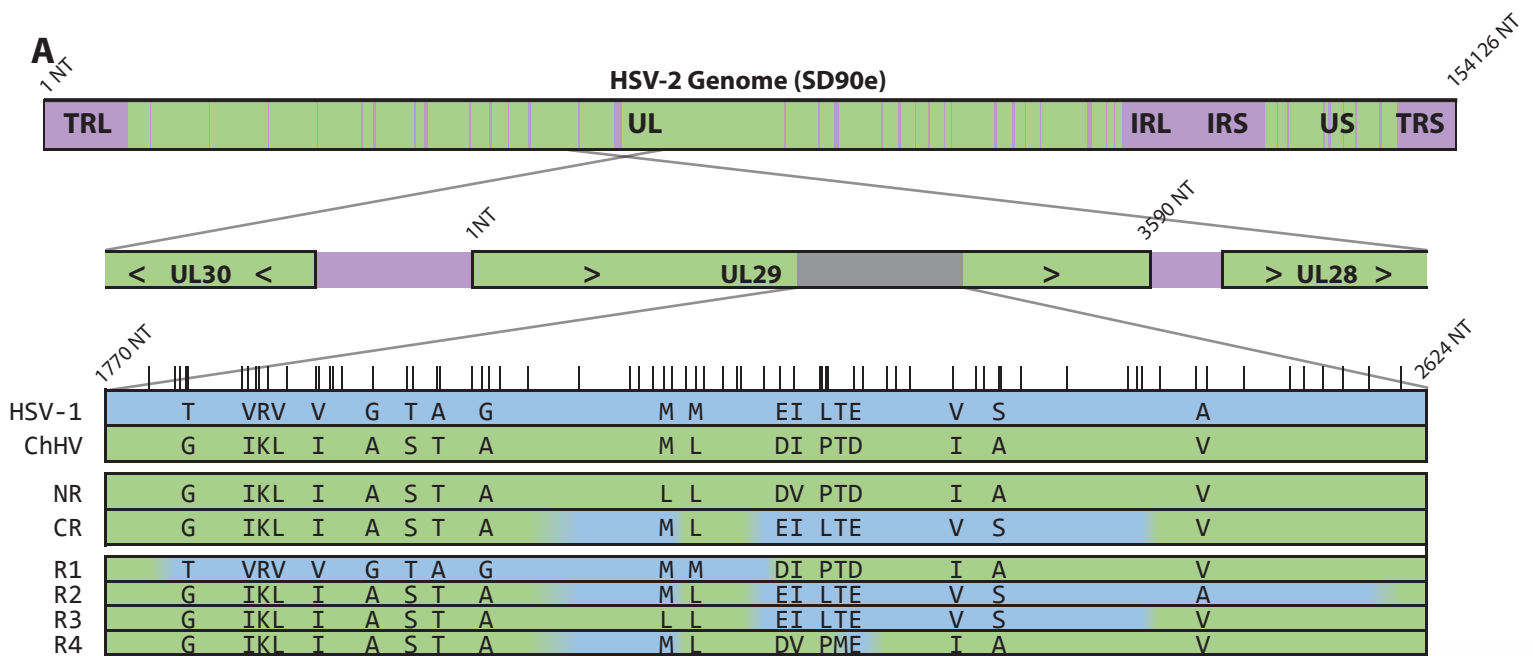

**B**

|                   | Total Samples | UL29 |     |      |    |
|-------------------|---------------|------|-----|------|----|
|                   |               | NR   | CR  | Rare | MD |
| Total Samples     | 213           | 1    | 209 | 3    |    |
| Central Africa    | 19            | 1    | 17  | 1    |    |
| East Africa       | 26            |      | 25  | 1    |    |
| Southern Africa   | 19            |      | 19  |      |    |
| West Africa       | 6             |      | 6   |      |    |
| Asia              | 8             |      | 8   |      |    |
| Europe            | 8             |      | 8   |      |    |
| North America     | 110           |      | 109 | 1    |    |
| South America     | 16            |      | 16  |      |    |
| Geography Unknown | 1             |      | 1   |      |    |

**C**

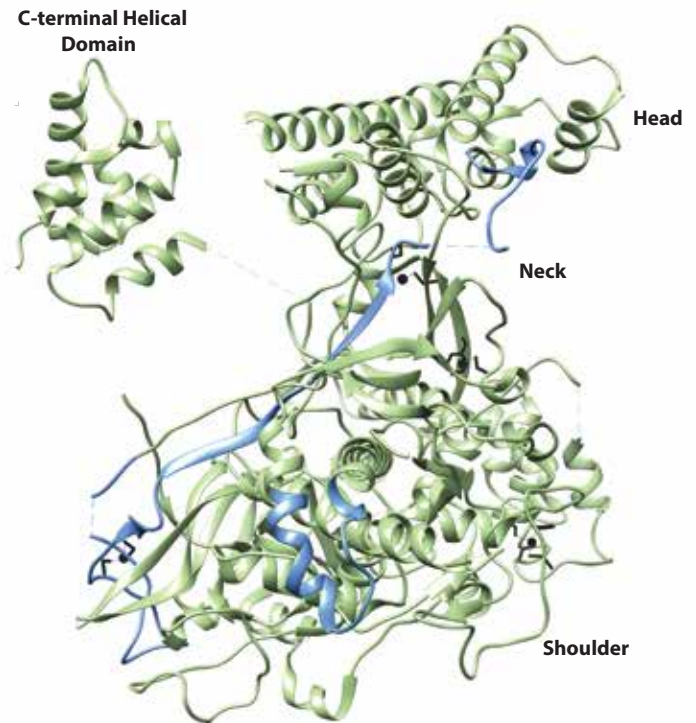

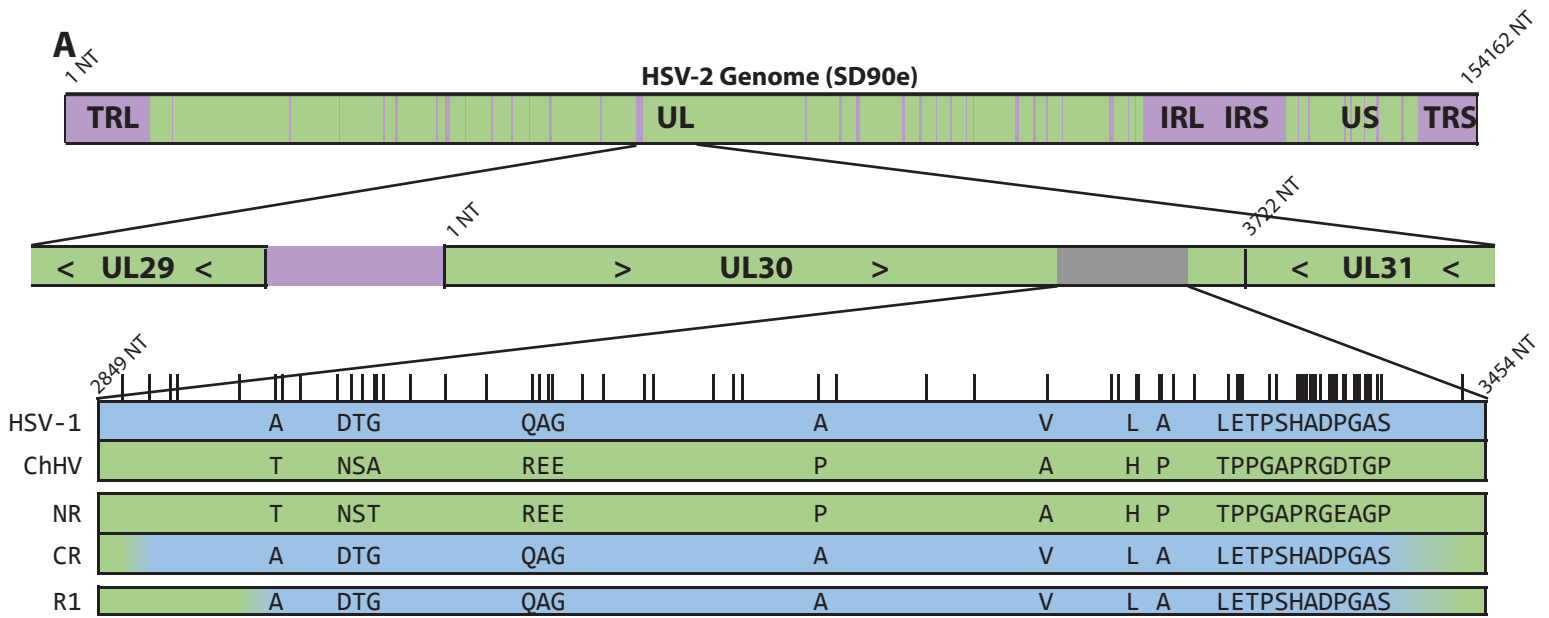

**B**

|                   | Total Samples | UL30 |     |      |    |
|-------------------|---------------|------|-----|------|----|
|                   |               | NR   | CR  | Rare | MD |
| Total Samples     | 213           | 8    | 202 | 1    | 2  |
| Central Africa    | 19            | 2    | 17  |      |    |
| East Africa       | 26            | 4    | 22  |      |    |
| Southern Africa   | 19            |      | 19  |      |    |
| West Africa       | 6             |      | 6   |      |    |
| Asia              | 8             |      | 8   |      |    |
| Europe            | 8             |      | 8   |      |    |
| North America     | 110           | 2    | 106 | 1    | 1  |
| South America     | 16            |      | 15  |      | 1  |
| Geography Unknown | 1             |      | 1   |      |    |

**C**

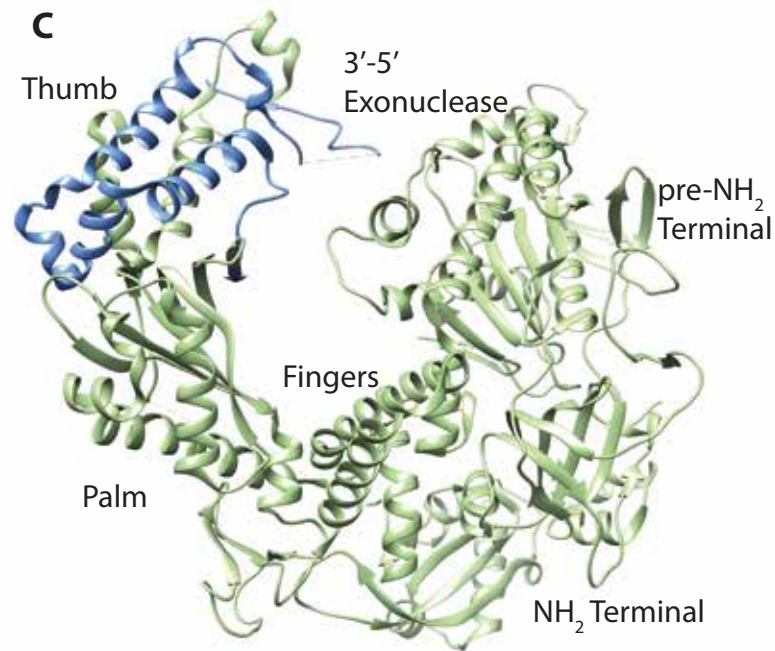

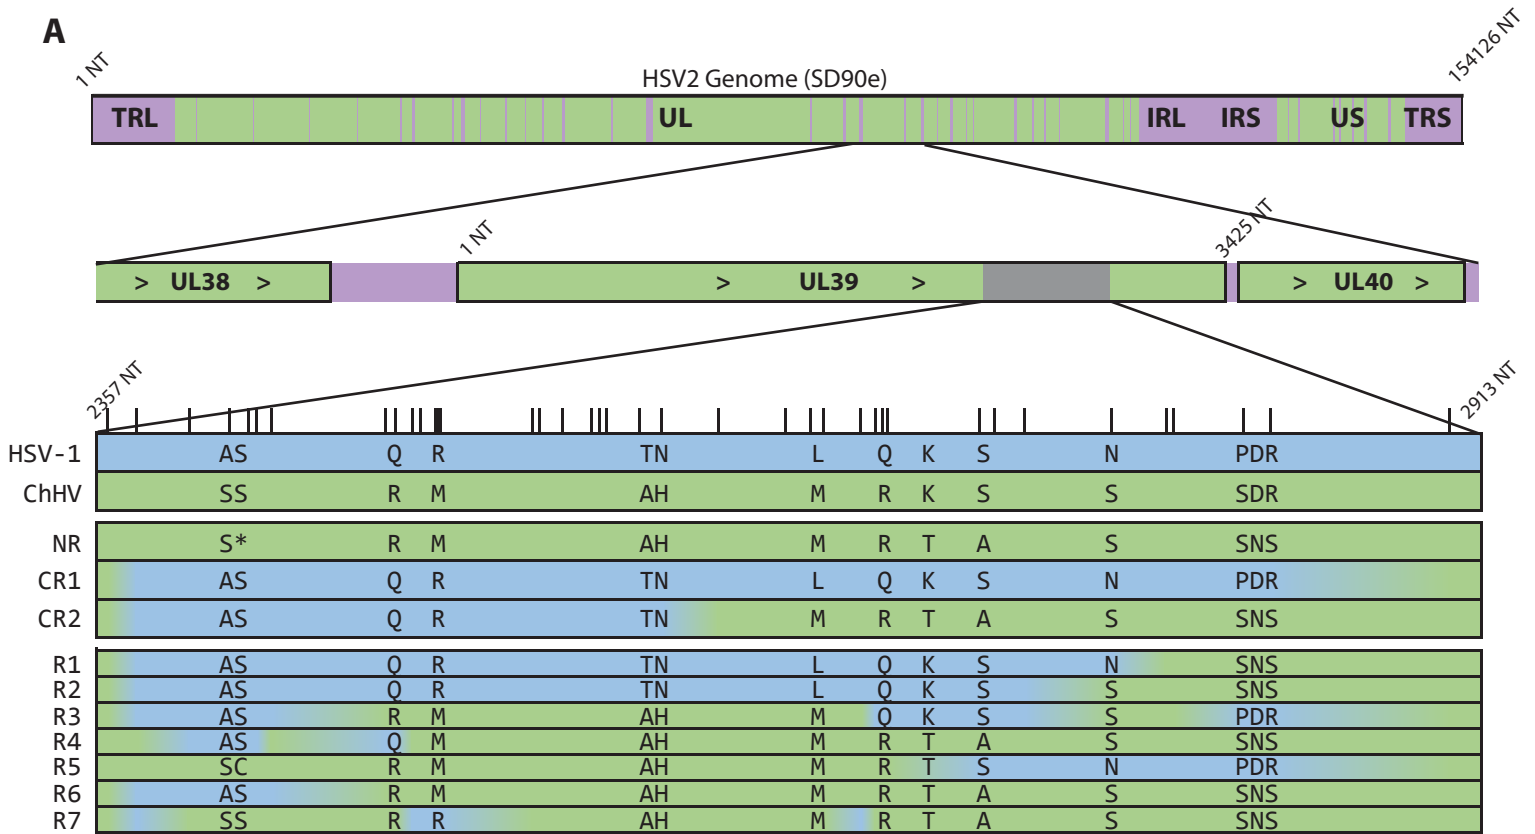

**B**

|                   | Total Samples | UL39 |     |     |      |    |
|-------------------|---------------|------|-----|-----|------|----|
|                   |               | NR   | CR1 | CR2 | Rare | MD |
| Total Samples     | 213           | 135  | 54  | 16  | 6    | 2  |
| Central Africa    | 19            | 8    | 3   | 6   | 1    | 1  |
| East Africa       | 26            | 21   | 3   | 1   | 1    |    |
| Southern Africa   | 19            | 11   | 5   | 3   |      |    |
| West Africa       | 6             | 4    | 2   |     |      |    |
| Asia              | 8             | 8    |     |     |      |    |
| Europe            | 8             | 4    | 2   | 1   | 1    |    |
| North America     | 110           | 68   | 33  | 5   | 3    | 1  |
| South America     | 16            | 10   | 6   |     |      |    |
| Geography Unknown | 1             | 1    |     |     |      |    |

**C**

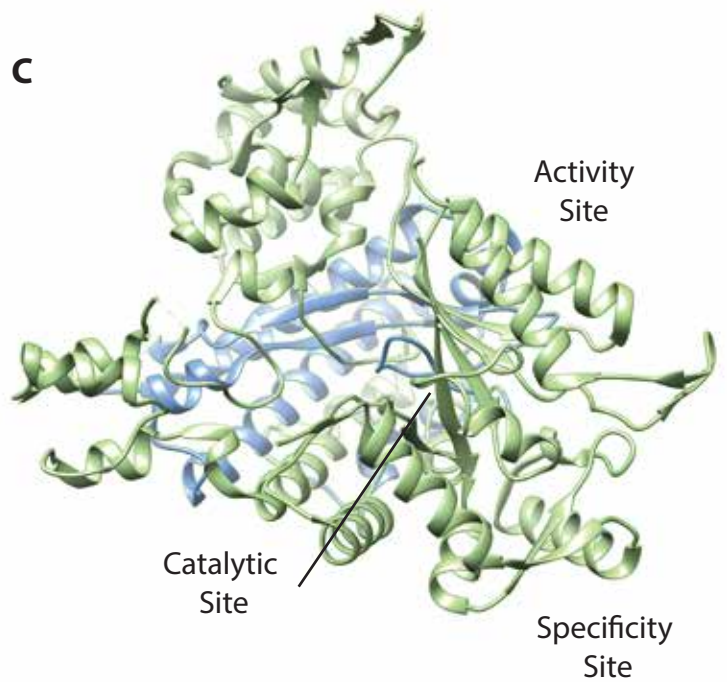



**A**

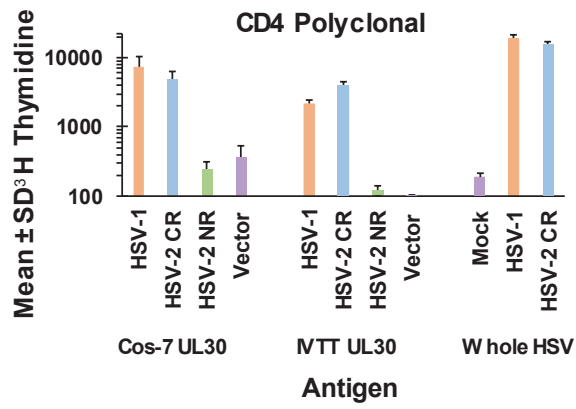

**B**

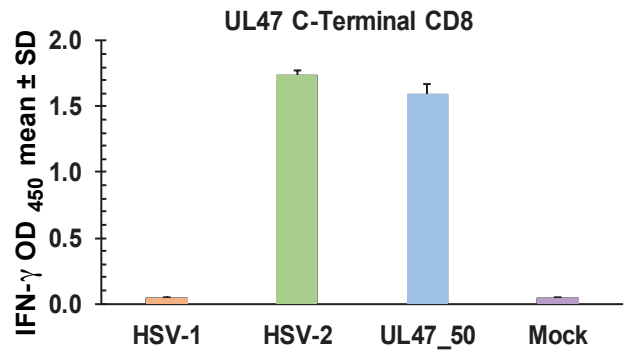

**C**

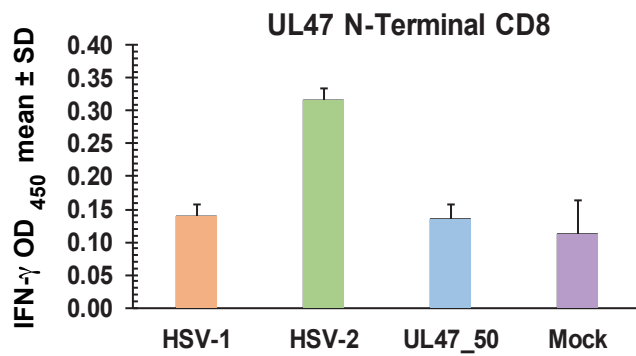

**D**

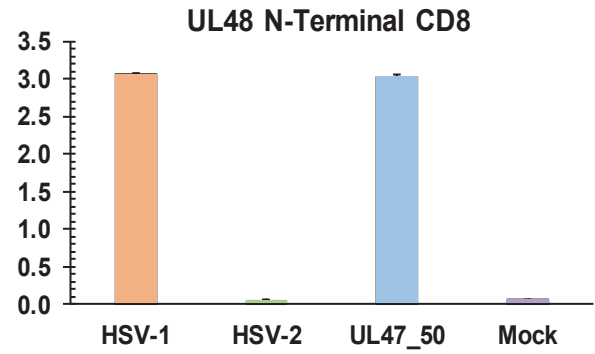

**E**

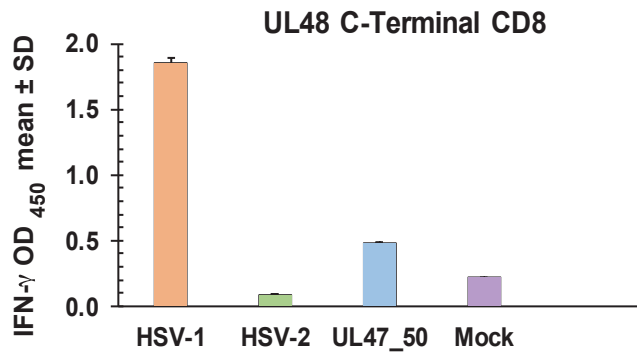

**F**

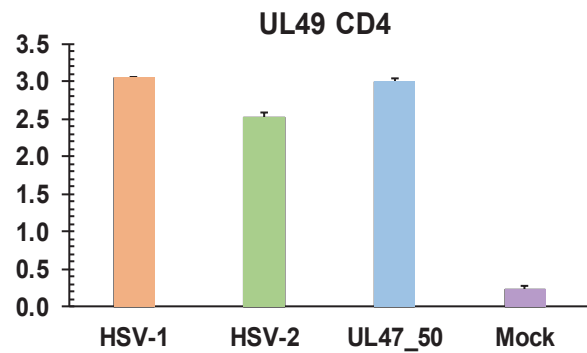

Source: http://biorxiv.org/content/10.1101/472639v1.full.pdf
